# Supplementary material for: Plant Pyranocoumarins: Description, Biosynthesis, Application
Source: MDPI journal article supplement (doi:10.3390/plants11223135), 2022-11-16
Supplement: s1 [file s1]

# Supplementary Materials:

Table S1. Substituents of pyranocoumarins.

|                                                                                     |                                                                                      |                                                                                       |
|-------------------------------------------------------------------------------------|--------------------------------------------------------------------------------------|---------------------------------------------------------------------------------------|
| 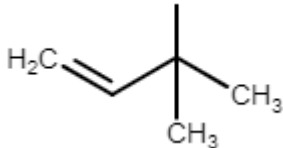   |    |    |
| 2-methylbut-3-en-2-yl                                                               | 6-hydroxy-3,7-dimethylocta-1,7-dien-3-yl                                             | 3,7-dimethylocta-1,6-dien-3-yl                                                        |
|    |    |    |
| 1-ethenyl-1,5-dimethyl-4-oxohex-5-en-1-yl                                           | 7-hydroxy-3,7-dimethylocta-1,5-dien-3-yl                                             | 3,7-dimethylocta-1,5,7-trien-3-yl                                                     |
|    |     |    |
| 6,7-dihydroxy-3,7-dimethylocta-1-en-3-yl                                            | acetyloxy                                                                            | propionyloxy                                                                          |
|  |  |   |
| isobutyryloxy (isobutyroyloxy)                                                      | isovaleryloxy (isovaleroyloxy)                                                       | 2-methylbutyryloxy                                                                    |
|  |   |  |
| seneciolyloxy                                                                       | angeloyloxy                                                                          | tigloyloxy                                                                            |
|  |   |  |
| 2-methyl-1-oxobutyl (2-methylbutyroyl?)                                             | 3-methyl-1-oxobutyl (isovaleroyl?)                                                   | methoxy                                                                               |

|                                   |                                    |                                     |
|-----------------------------------|------------------------------------|-------------------------------------|
|                                   |                                    |                                     |
| 3-methyl-but-2-enyl               | geranyl                            | isobutyryl                          |
|                                   |                                    |                                     |
| 2-methylbutyryl                   | butanal                            | butoxy                              |
|                                   |                                    |                                     |
| 3-(Methylthio)acrylic acid        | benzoyloxy                         | 3-methyl-but-1,3-dienyl             |
|                                   |                                    |                                     |
| capryloyloxy                      |                                    | 3-methyl-but-3-enyloxy              |
|                                   |                                    |                                     |
| 1,2-dihydroxy-3-methyl-but-3-enyl | 2,3-dimethyloxirane-2-carboxylatyl | 3-chloro-2-hydroxy-2-methylbutanoyl |

**Table S2.** Structures of pyranocoumarins.

|                                            |    |    |    |      |
|--------------------------------------------|----|----|----|------|
|                                            |    |    |    |      |
|                                            | R1 | R2 | R3 | R4   |
| Dihydroxanthyletin                         | H  | H  | H  | H    |
| (-)-3-(R)-Decursinol (Smirniol, Aegelinol) | H  | H  | H  | R-OH |
| (+)-Decursinol ((-)-Smirniol)              | H  | H  | H  | S-OH |
| Decursidinol                               | H  | H  | OH | OH   |

|                                                                                    |         |                                                 |      |                |
|------------------------------------------------------------------------------------|---------|-------------------------------------------------|------|----------------|
| (+)-trans-Decursidinol                                                             | H       | H                                               | R-OH | S-OH           |
| (-)-cis-Decursidinol                                                               | H       | H                                               | S-OH | S-OH           |
| Decursitin F                                                                       | H       | H                                               | R-OH | S-acetoxy      |
| 4-Hydroxy Pd-C-III                                                                 | H       | H                                               | R-OH | S- angeloyloxy |
| Pd-C-I                                                                             | H       | H                                               | R-OH | S-seneciolyoxy |
| Benzoyl aegelinol                                                                  | H       | H                                               | H    | benzoyloxy     |
| Clausenin                                                                          | OH      | H                                               | O    | H              |
| Clausenidin                                                                        | OH      | 2,2-dimethylbut-3-enyl                          | O    | H              |
| Clauemarmarin A                                                                    | OH      | 3,7-dimethylocta-1,5,7-trien-3-yl               | H    | H              |
| Clauemarmarin B                                                                    | OH      | 6,7-dihydroxy-3,7-dimethylocta-1-en-3-yl        | H    | H              |
| Clauemarmarin C                                                                    | OH      | (R)-6-hydroxy-3,7-dimethylocta-1,7-dien-3-yl    | H    | H              |
| Clauemarmarin D                                                                    | OH      | (S)-6-hydroxy-3,7-dimethylocta-1,7-dien-3-yl    | H    | H              |
| 5-hydroxy-8,8-dimethyl-10-(7-hydroxy-3,7-dimethylocta-1,5-dien-3-yl)pyranocoumarin | OH      | 7-hydroxy-3,7-dimethylocta-1,5-dien-3-yl        | H    | H              |
| 5-hydroxy-8,8-dimethyl-10-(3',7'-dimethylocta-1',6'-dien-3'-yl)pyranocoumarin      | OH      | 3,7-dimethylocta-1,6-dien-3-yl                  | H    | H              |
| Clauemarmarin K                                                                    | OH      | (S/R)-1-ethenyl-1,5-dimethyl-4-oxohex-5-en-1-yl | H    | H              |
| 10-(7-Hydroxy-3,7-dimethylocta-1,5-dien-3-yl)-5-methoxy-8,8-dimethylpyranocoumarin | methoxy | 7-hydroxy-3,7-dimethylocta-1,5-dien-3-yl        | H    | H              |
| 10-(3,7-Dimethylocta-1,6-dien-3-yl)-5-methoxy-8,8-dimethylpyranocoumarin           | methoxy | 3,7-dimethylocta-1,6-dien-3-yl                  | H    | H              |
| Dentatin                                                                           | methoxy | 2-methylbut-3-en-2-yl                           | H    | H              |
| Nordentain                                                                         | OH      | 2-methylbut-3-en-2-yl                           |      |                |
| Arnottianin                                                                        | H       | methoxy                                         | H    | OH             |
| Decursin (Grandivitin)                                                             | H       | H                                               | H    | S-seneciolyoxy |
| Decursinol angelate                                                                | H       | H                                               | H    | angeloyloxy    |
| Grandivittin                                                                       | H       | H                                               | H    | seneciolyoxy   |
| Aegelinol benzoat                                                                  | H       | H                                               | H    | benzoyloxy     |
| 3'(R)-O-β-D-Glucopyranosyl-3',4'-dihydroxanthyletin                                | H       | H                                               | H    | O-glucoside    |
| Seseloside                                                                         | H       | OH                                              | H    | O-glucoside    |

|                                                           |   |   |                                     |                                     |
|-----------------------------------------------------------|---|---|-------------------------------------|-------------------------------------|
| (-)-methyl-Decursidinol                                   | H | H | S- methoxy                          | R-OH                                |
| Peuarin                                                   | H | H | methoxy                             | angeloyloxy                         |
| 4'-Methoxy Pd-C-I                                         | H | H | R-methoxy                           | S-seneciolyoxy                      |
| Pd-C-III                                                  | H | H | R-acetoxy                           | S-angeloyloxy                       |
| AD-I                                                      | H | H | R-isovaleryloxy                     | S-angeloyloxy                       |
| Pd-C-II                                                   | H | H | R-seneciolyoxy                      | S-OH                                |
| Pd-C-IV                                                   | H | H | R-seneciolyoxy                      | S-acetoxy                           |
| Decursidin                                                | H | H | R-seneciolyoxy                      | S-seneciolyoxy                      |
| AD-II                                                     | H | H | R-seneciolyoxy                      | S- angeloyloxy                      |
| 3'(S)-Acetoxy-4'(R)-angeloyloxy-3', 4'-dihydroxanthyletin | H | H | R-angeloyloxy                       | S-acetoxy                           |
| Decursitin D                                              | H | H | R-angeloyloxy                       | S-OH                                |
| Pd-C-V                                                    | H | H | R-angeloyloxy                       | S-acetoxy                           |
| Decursitin C (Andelin)                                    | H | H | R-angeloyloxy                       | S-seneciolyoxy                      |
| Decursitin B                                              | H | H | R-angeloyloxy                       | S-angeloyloxy                       |
| Xanthalin                                                 | H | H | angeloyloxy                         | tigloyloxy                          |
| Peuarenarine                                              | H | H | 2,3-dimethyloxirane-2-carboxylatyl  | tigloyloxy                          |
| Peuarenine                                                | H | H | 2,3-dimethyloxirane-2-carboxylatyl  | 2,3-dimethyloxirane-2-carboxylatyl  |
| Peuchlorin                                                | H | H | 3-chloro-2-hydroxy-2-methylbutanoyl | angeloyloxy                         |
| Peuchlorinin butyroyl isohellaktone                       | H | H | 3-chloro-2-hydroxy-2-methylbutanoyl | 2,3-dimethyloxirane-2-carboxylatyl  |
| Peuchloridin                                              | H | H | 3-chloro-2-hydroxy-2-methylbutanoyl | 3-chloro-2-hydroxy-2-methylbutanoyl |

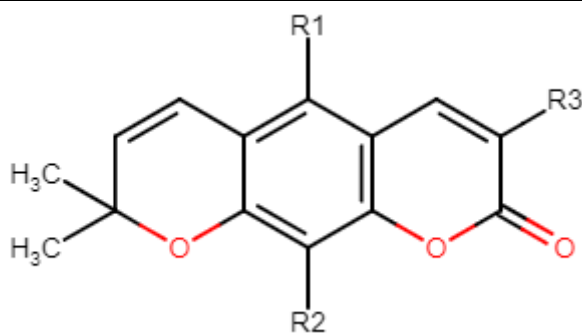

|                                                             | R1      | R2                    | R3                    |
|-------------------------------------------------------------|---------|-----------------------|-----------------------|
| Xanthyletin                                                 | H       | H                     | H                     |
| Luvangetin                                                  | H       | methoxy               | H                     |
| Xanthoxyletin                                               | methoxy | H                     | H                     |
| Agasyllin                                                   | H       | H                     | angeloyloxy           |
| Xanthyletin 3-(1,1-dimetylbut-3-enyl)                       | H       | H                     | 1,1-dimetylbut-3-enyl |
| Xanthyletin 3-(3-metylbut-2-enyl)                           | H       | H                     | 3-metylbut-2-enyl     |
| Xanthyletin 3-(1,1-dimetylbut-3-enyl)-8-(3-metylbut-2-enyl) | H       | 3-metylbut-2-enyl     | 1,1-dimetylbut-3-enyl |
| Nordentatin                                                 | OH      | 1,1-dimetylbut-3-enyl | H                     |
| Clausarin                                                   | OH      | 1,1-dimetylbut-3-enyl | 1,1-dimetylbut-3-enyl |
| Trachyphyllin                                               | OH      | 3-methyl-but-2-enyl   | H                     |
| Poncitrin                                                   | methoxy | 1,1-dimetylbut-3-enyl | H                     |

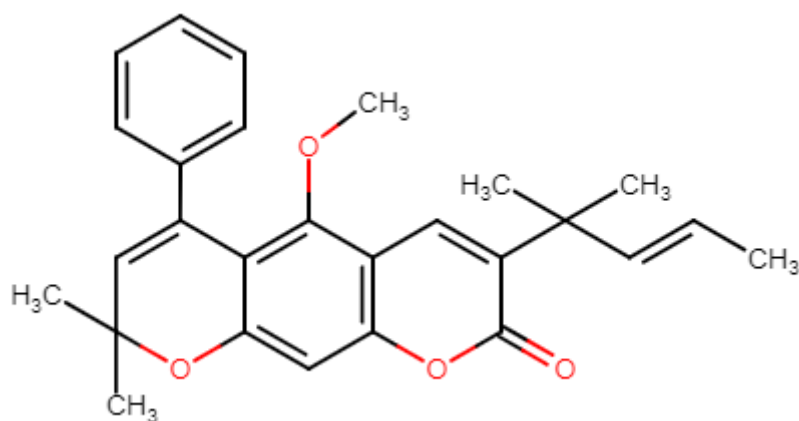

Phenyl derivative of pyranocoumarin (PDP)

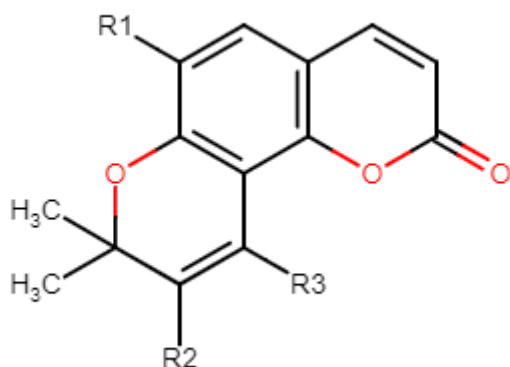

|                                                   | R1      | R2   | R3                 |
|---------------------------------------------------|---------|------|--------------------|
| Seselin                                           | H       | H    | H                  |
| Norbraylin                                        | OH      | H    | H                  |
| Braylin                                           | methoxy | H    | H                  |
| Lomatin                                           | H       | OH   | H                  |
| (-)-trans-Khellactone (cis-Khellactone; Visnagan) | H       | OH   | OH                 |
| trans-Khellactone / cis-Khellactone               | H       | R-OH | S-OH               |
| (-)-cis-Ethylkhellactone                          | H       | S-OH | S-ethoxy           |
| (+)-trans-Ethylkhellactone                        | H       | S-OH | R-ethoxy           |
| Lomatin<br>O-isovaleroyl ester                    | H       | H    | isovaleryloxy      |
| Lomatin<br>2-methylbutyryl ester                  | H       | H    | 2-methylbutyryloxy |
| Praeroside V                                      | H       | H    | S-O- glucoside     |
| Khellactone 4'-O-methyl ester                     | H       | OH   | methoxy            |
| Khellactone 4'-O-acetyl ester                     | H       | OH   | acetyloxy          |
| Qianhucoumarin C                                  | H       | S-OH | S-acetyloxy        |
| Khellactone 4'-O-isobutyryl ester                 | H       | OH   | isobutyryloxy      |
| Khellactone 4'-O-isovaleroyl ester                | H       | OH   | isovaleryloxy      |
| Khellactone 4'-O- 2-methylbutyryl ester           | H       | OH   | 2-methylbutyryloxy |
| Turgeniifolin C                                   | H       | OH   | seneciolyloxy      |
| Peujaponisinol B                                  | H       | S-OH | S-seneciolyloxy    |
| d-Laserpitin (Peujaponisinol B, Isolehmannidin)   | H       | OH   | angeloyloxy        |
| (+)-Laserpitin                                    | H       | S-OH | S-angeloyloxy      |

|                                                                                           |   |                    |                        |
|-------------------------------------------------------------------------------------------|---|--------------------|------------------------|
| (±)-4'-Tigloylkhellactone                                                                 | H | OH                 | tigloyloxy             |
| Qianhucoumarin A                                                                          | H | R-OH               | R- tigloyloxy          |
| Khellactone-4'-O-glucoside                                                                | H | OH                 | glucoside              |
| Khellactone O-isobutyryl ester                                                            | H | OH / isobutyryloxy | isobutyryloxy / OH     |
| Khellactone O-hexoside                                                                    | H | OH / hexoside      | hexoside / OH          |
| Khellactone 3'-O-methyl ester                                                             | H | methoxy            | OH                     |
| Qianhucoumarin B                                                                          | H | S-acetyloxy        | S-OH                   |
| 3'-acetoxy-4'-metyl-3',4'-dihydroseselin                                                  | H | acetyloxy          | metyloxy               |
| Khellactone 3',4'-di-O-acetyl ester                                                       | H | acetyloxy          | acetyloxy              |
| Qianhucoumarin D                                                                          | H | S-acetyloxy        | S-acetyloxy            |
| 3'(R)-acetoxy-4'(S)- propionyloxy - 3',4'-dihydroseselin                                  | H | R-acetyloxy        | R-propionyloxy         |
| Hyuganin D (Seravshanin, Isobocconin)                                                     | H | acetyloxy          | isobutyryloxy          |
| (3'S,4'R)-3'-acetyl-4'-isobutyrylkhellactone                                              | H | S-acetyloxy        | R-isobutyryloxy        |
| Suksdorfin                                                                                | H | acetyloxy          | isovaleroyloxy         |
| 3'-acetyl-4'-isovalerylkhellactone                                                        | H | R-acetyloxy        | R-isovaleroyloxy       |
| Corymbocoumarin (+)- <i>cis</i> -3'-acetoxy-4'-(2-methylbutyroyloxy)-3',4'-dihydroseselin | H | acetyloxy          | 2-methylbutyroyloxy    |
| Hyuganin C                                                                                | H | acetyloxy          | 2-methyl-3-oxobutanoxo |
| Isosamidin                                                                                | H | acetyloxy          | seneciolyloxy          |
| (-)- <i>trans</i> -3'-Acetyl-4'-seneciolykhellactone                                      | H | acetyloxy          | seneciolyloxy          |
| Pteryxin                                                                                  | H | R-acetyloxy        | R-angeloyloxy          |
| Peucedanocoumarin II                                                                      | H | S-acetyloxy        | R-angeloyloxy          |
| 3'(R)-acetoxy-4'(S)-angeloyloxy-3',4'-dihydroseselin                                      | H | R-acetyloxy        | S-angeloyloxy          |
| Longshengensin A                                                                          | H | S-acetyloxy        | S-angeloyloxy          |
| (±)- <i>cis</i> -3'-Acetyl-4'-tigloylkhellactone                                          | H | acetyloxy          | tigloyloxy             |
| (+)- <i>trans</i> -3'-Acetyl-4'-tigloylkhellactone                                        | H | acetyloxy          | tigloyloxy             |
| (3'R,4'S)-3'-acetyl-4'-tigloylkhellactone                                                 | H | R-acetyloxy        | S-tigloyloxy           |
| Peucedanocoumarin III                                                                     | H | S-acetyloxy        | R- tigloyloxy          |
| Quanhucoumarin I                                                                          | H | S-acetyloxy        | S- tigloyloxy          |
| Khellactone 3'-O- isobutyryl ester                                                        | H | isobutyryloxy      | H                      |
| Campestrol                                                                                | H | isobutyryloxy      | OH                     |
| <i>cis</i> -3'-isobutyryl-4'-acetylkhellactone                                            | H | R-isobutyryloxy    | R-acetyloxy            |
| 3'.4'-di-O-isobutyryl- <i>cis</i> -khellactone                                            | H | isobutyryloxy      | isobutyryloxy          |
| Lomatin isovalerate                                                                       | H | isovaleryloxy      | H                      |
| Hystrixarin (Turgeniifolin B)                                                             | H | isovaleryloxy      | OH                     |
| 3'-Isovaleryl-4'-keto-khellactone (Petracoumarin)                                         | H | isovaleryloxy      | O                      |
| Dihydrosamidin                                                                            | H | isovaleryloxy      | acetyloxy              |
| Peucedanocoumarin I                                                                       | H | S-isovaleryloxy    | R-acetyloxy            |
| Khellactone 3'-O-isovaleroyl-4'-O isobuturoyl ester                                       | H | isovaleryloxy      | isobutyryloxy          |
| Khellactone 3',4'-di-O-isovaleroyl                                                        | H | isovaleryloxy      | isovaleroyloxy         |

|                                                           |   |                                     |                                     |
|-----------------------------------------------------------|---|-------------------------------------|-------------------------------------|
| 3'(S), 4'(S)-diisovaleryloxy-3',4'-dihydroseselin         | H | S-isovaleryloxy                     | S-isovaleroxyloxy                   |
| Khellactone isovaleroyl-2-methylbutyroyl ester            | H | isovaleryloxy / 2-methylbutyroyloxy | 2-methylbutyroyloxy / isovaleryloxy |
| Khellactone 3'-O-isovaleroyl-4'-O seneciroyl ester        | H | isovaleryloxy                       | seneciroyloxy                       |
| cis-3'-isovaleryl-4'-seneciroylkhellactone                | H | S-isovaleryloxy                     | S-seneciroyloxy                     |
| Khellactone 3'-O-isovaleroyl-4'-O angeloyl ester          | H | isovaleryloxy                       | angeloyloxy                         |
| Visnadin                                                  | H | 2-methylbutyroyloxy                 | acetyloxy                           |
| (-)-Visnadin                                              | H | S-2-methylbutyroyloxy               | S-acetyloxy                         |
| Khellactone 3'-O- 2-methylbutyroyl-4'-O isobutyroyl ester | H | 2-methylbutyroyloxy                 | isobutyroyloxy                      |
| Khellactone 3',4'-di-O-2-methylbutyroyl ester             | H | 2-methylbutyroyloxy                 | 2-methylbutyroyloxy                 |
| Khellactone 3'-O-2-methylbutyroyl-4'-O seneciroyl ester   | H | 2-methylbutyroyloxy                 | seneciroyloxy                       |
| Khellactone 3'-O-isovaleroyl-4'-O angeloyl ester          | H | 2-methylbutyroyloxy                 | angeloyloxy                         |
| Khellactone 3',4'-di-O-isobutyroyl ester                  | H | 2-methylpropanoxy                   | isobutyroyloxy                      |
| Buchtarmine                                               | H | seneciroyloxy                       | H                                   |
| Isocampesol                                               | H | seneciroyloxy                       | OH                                  |
| Peujaponisinol A                                          | H | S-seneciroyloxy                     | S-OH                                |
| 3'(S)-seneciroyloxy-4' (S)-ethoxy-3',4'-dihydroseselin    | H | S-seneciroyloxy                     | S-ethoxy                            |
| Samidin                                                   | H | seneciroyloxy                       | acetyloxy                           |
| (+)-Samidin                                               | H | S-seneciroyloxy                     | S-acetyloxy                         |
| Khellactone 3'-O-seneciroyl-4'-O-isovaleroyl ester        | H | seneciroyloxy                       | isovaleroxyloxy                     |
| Peujaponisin                                              | H | S-seneciroyloxy                     | S-isovaleroxyloxy                   |
| Khellactone 3'-O-seneciroyl-4'-O-2-methylbutyroyl ester   | H | seneciroyloxy                       | 2-methylbutyroyloxy                 |
| cis-Khellactone disenecionate                             | H | seneciroyloxy                       | seneciroyloxy                       |
| 3'(S),4'(S)-diseneciroyloxy-3',4'-dihydroseselin          | H | S-seneciroyloxy                     | S-seneciroyloxy                     |
| Khellactone 3'-O-seneciroyl-4'-O angeloyl ester           | H | seneciroyloxy                       | angeloyloxy                         |
| cis-3'-seneciroyl-4'-angeloylkhellactone                  | H | R-seneciroyloxy                     | R-angeloyloxy                       |
| Isocalypteryxin                                           | H | seneciroyloxy                       | tigloyloxy                          |
| Jatamansin (Selinidin, Xanthogalin)                       | H | angeloyloxy                         | H                                   |
| Isolaserpetin                                             | H | angeloyloxy                         | OH                                  |
| (3'R,4'S)-3'-angeloylkhellactone                          | H | R-angeloyloxy                       | S-OH                                |
| Turgeniifolin A (Pd-Ib)                                   | H | R-angeloyloxy                       | O                                   |
| 3'-angeloyloxy-4'-butoxy-3',4'-dihydroseselin             | H | angeloyloxy                         | butoxy                              |
| (±)-Praeruptorin A (Pd-Ia)                                | H | angeloyloxy                         | acetyloxy                           |
| 3'-angeloyl-4'-propionylkhellactone                       | H | angeloyloxy                         | propionyloxy                        |
| Qianhucoumarin J                                          | H | S-angeloyloxy                       | S-propionyloxy                      |

|                                                           |   |                            |                            |
|-----------------------------------------------------------|---|----------------------------|----------------------------|
| (-)-Praeruptorin A (Isopteryxin)                          | H | R-angeloyloxy              | R-acetyloxy                |
| (+)-Praeruptorin A                                        | H | S-angeloyloxy              | S-acetyloxy                |
| Khellactone 3'-O-angeloyl-4'-O-isobutyryl ester           | H | angeloyloxy                | isobutyryloxy              |
| Praeruptorin E                                            | H | angeloyloxy                | isovaleroyloxy             |
| (+)-Praeruptorin E (Qianhuocoumarin H, Pd-III)            | H | S- angeloyloxy             | S-isovaleryloxy            |
| Khellactone 3'-O- angeloyl-4'-O-2-methylbutyroyl ester    | H | angeloyloxy                | 2-methylbutyroyloxy        |
| Calypteryxin (Peuformosin)                                | H | angeloyloxy                | seneciolyloxy              |
| (±)-Praeruptorin B (Anomalin)                             | H | angeloyloxy                | angeloyloxy                |
| (+)-Praeruptorin B (Pd-II, ((+)-Anomalin, Praeruptorin C) | H | R- angeloyloxy             | R- angeloyloxy             |
| (-)-Praeruptorin B (Praeruptorin D, Anomalin)             | H | S- angeloyloxy             | S- angeloyloxy             |
| Khellactone 3'-O-tigloyl ester                            | H | tigloyloxy                 | OH                         |
| Qianhuocoumarin E                                         | H | R-tigloyloxy               | O                          |
| (+)-trans-4'-Acetyl-3'-tigloylkhellactone                 | H | tigloyloxy                 | acetyloxy                  |
| Floroselin                                                | H | tigloyloxy                 | 3-(methylthio)acrylic acid |
| Campestrinol                                              | H | geranyloxy                 | OH                         |
| Campestrinoside (Praeroside II)                           | H | O-glucoside                | OH                         |
| Praeroside II                                             | H | R-O-glucoside              | R-OH                       |
| Praeroside IV                                             | H | R-O-glucoside              | H                          |
| Praeroside III                                            | H | S-O-glucoside              | R-OH                       |
| 3'-Capryloyloxyxanthogalol (Octanoyllomatine)             | H | capryloyloxy               | H                          |
| Isofloroselin                                             | H | 3-(methylthio)acrylic acid | angeloyloxy                |

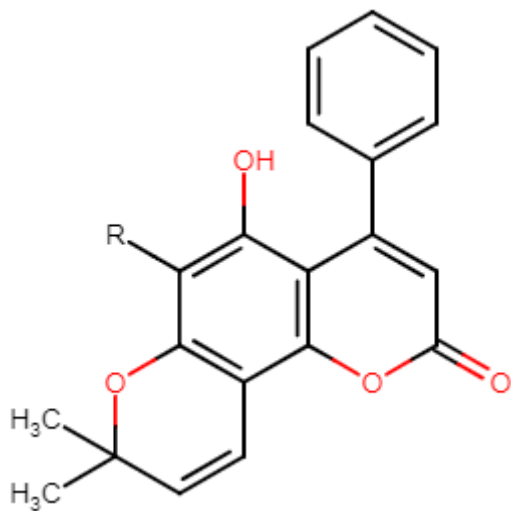

|                     |                                   |
|---------------------|-----------------------------------|
|                     | R                                 |
| mammea A/AA cyclo D | 3-methyl-1-oxobutyl (isovaleryl?) |
| mammea A/AD cyclo D | isobutyryl                        |
| mammea A/AB cyclo D | 2-methylbutyryl                   |



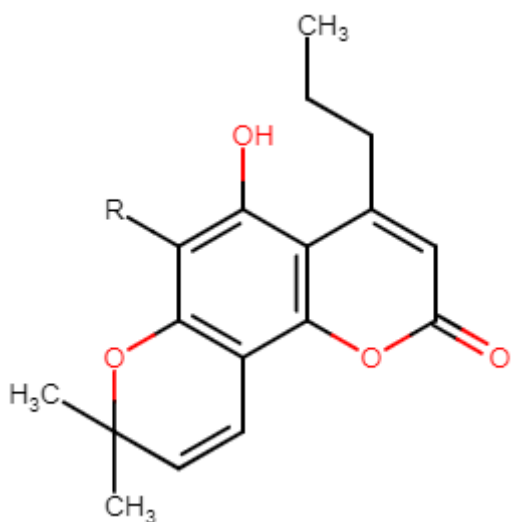

|                     |                                         |
|---------------------|-----------------------------------------|
|                     | R                                       |
| mammea B/AB cyclo D | 2-methyl-1-oxobutyl (2-methylbutyroyl?) |
| mammea B/AC cyclo D | butanal                                 |

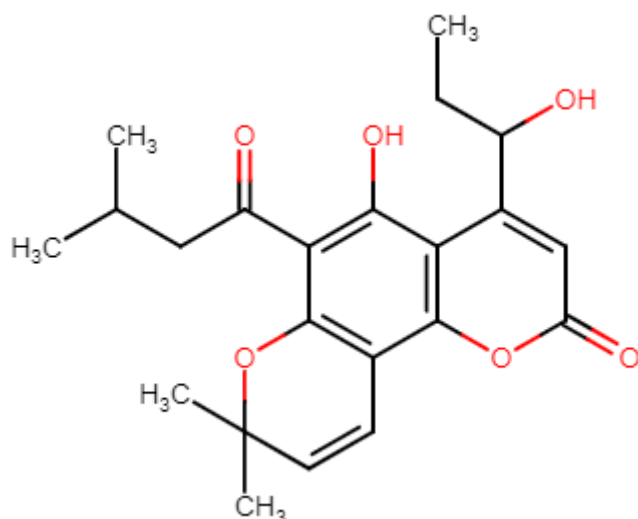

Deacetylmammea E/AA cyclo D

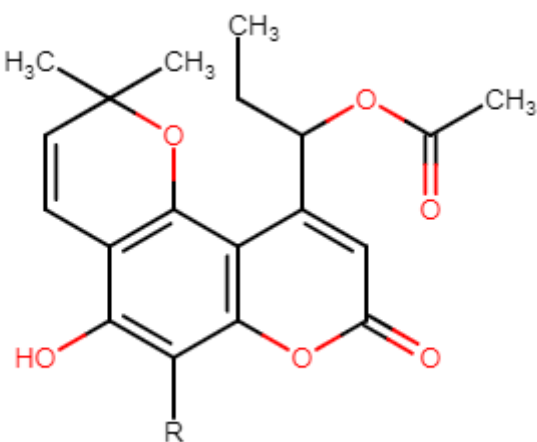

|                     |            |
|---------------------|------------|
|                     | R          |
| Mammea E/BC cyclo D | butanal    |
| Mammea E/BD cyclo D | isobutyryl |

|                                                                                                             |                                         |                                  |
|-------------------------------------------------------------------------------------------------------------|-----------------------------------------|----------------------------------|
| 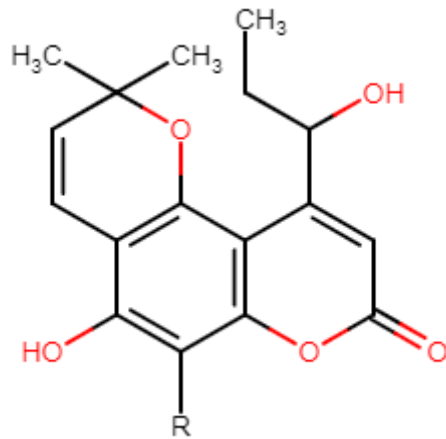                           |                                         |                                  |
|                                                                                                             | R                                       |                                  |
| Deacetylmammea E/BB cyclo D                                                                                 | 2-methyl-1-oxobutyl (2-methylbutyroyl?) |                                  |
| Deacetylmammea E/BC cyclo D                                                                                 | butanal                                 |                                  |
|                           |                                         |                                  |
|                                                                                                             | R1                                      | R2                               |
| Alloxanthoxyletin                                                                                           | methoxy                                 | H                                |
| Avicennin                                                                                                   | methoxy                                 | 3-metyl-buta-1,3-dienyl          |
| Avicennol                                                                                                   | methoxy                                 | 3-metyl-buta-3-enyloxy           |
| Dipetaline                                                                                                  | methoxy                                 | 3-methyl-but-2-enyl              |
| c-Avicennol                                                                                                 | methoxy                                 | 1,2-dihydroxy-3-metyl-but-3-enyl |
|                          |                                         |                                  |
|                                                                                                             | R1                                      | R2                               |
| 8-hydroxy-5-methyl-7-(3-methyl-but-2-enyl)-9-(3-methyl-1-oxobutyl)-4,5-dihydropyrano[4,3,2-de]chromen-2-one | 3-methyl-but-2-enyl                     | 3-methyl-1-oxobutyl              |

|                                                                                                                              |                     |                     |
|------------------------------------------------------------------------------------------------------------------------------|---------------------|---------------------|
| 8-hydroxy-5-methyl-7-(3-methyl-but-2-enyl)-9-(2-methyl-1-oxobutyl)-4,5-dihydropyrano[4,3,2- <i>de</i> ]chromen-2-one         | 3-methyl-but-2-enyl | 2-methyl-1-oxobutyl |
| 8-hydroxy-5-methyl-7-(3,7-dimethylocta-2,6-dienyl)-9-(3-methyl-1-oxobutyl)-4,5-dihydropyrano[4,3,2- <i>de</i> ]chromen-2-one | geranyl             | 3-methyl-1-oxobutyl |
|                                                                                                                              |                     |                     |
| 8-hydroxy-5-methyl-7-(3,7-dimethylocta-2,6-dienyl)-9-(2-methyl-1-oxobutyl)-4,5-dihydropyrano[4,3,2- <i>de</i> ]chromen-2-one | geranyl             | 2-methyl-1-oxobutyl |
| Mammeasin C                                                                                                                  | geranyl             | isobutyroyl         |
| Mammeasin D                                                                                                                  | geranyl             | butanal             |

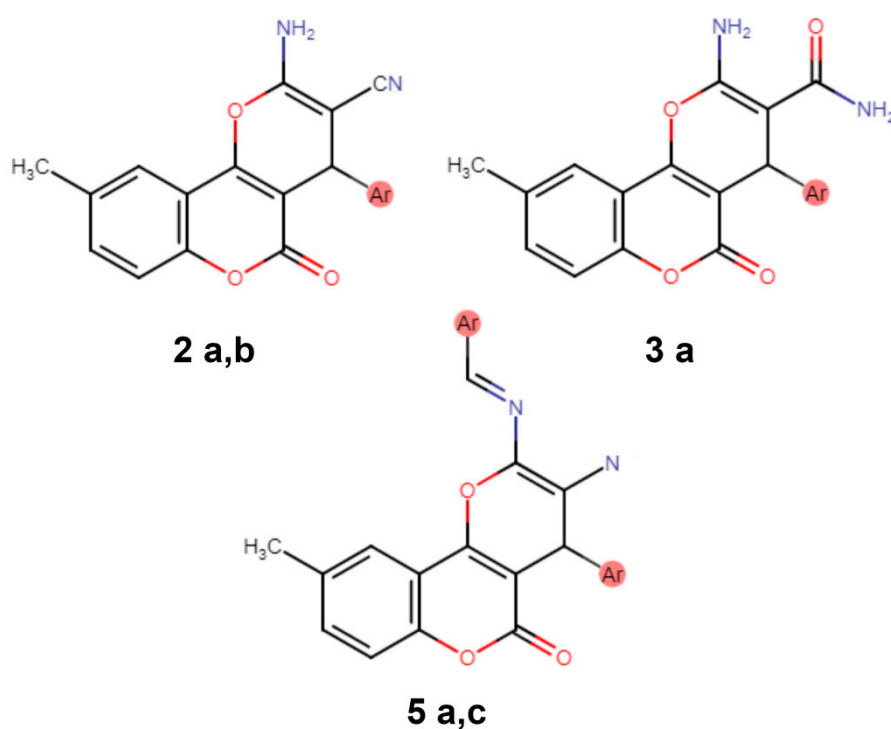

**Figure S1.** Structures of artificial pyranocoumarins [31]

**Table S3.** The content of pyranocoumarins in plants.

| Compounds                             | Species<br><i>Umbelliferae</i> ( <i>Apiaceae</i> ) | Plant parts (yield, % dry mass) |                |              |             |                 |            |      |       | References |            |
|---------------------------------------|----------------------------------------------------|---------------------------------|----------------|--------------|-------------|-----------------|------------|------|-------|------------|------------|
|                                       |                                                    | Unkn<br>own                     | Whole<br>plant | Aerial parts |             |                 |            |      | Roots |            | See-<br>ds |
|                                       |                                                    |                                 |                | Flo-<br>wers | Um-<br>bels | Stems/<br>Twigs | Leav<br>es | Bark |       |            |            |
| Agasyllin (L*)                        | <i>Agasyllis latifolia</i> (M. Bieb.)<br>Boiss.    | +                               | ?              | ?            | ?           | ?               | ?          | –    | ?     | ?          | [113]      |
| Campestrinoside (Praeroside II) (Ad*) | <i>Ammi visnaga</i> (L.) Lam.                      | –                               | ?              | ?            | ?           | ?               | ?          | –    | ?     | +          | [114]      |
| Visnadin (Ad)                         |                                                    | –                               | ?              | ?            | +           | ?               | ?          | –    | ?     | 0.46       | [115-117]  |
| Samidin (Ad)                          |                                                    | –                               | ?              | ?            | +           | ?               | ?          | –    | +     | 0.08       | [116-118]  |
| Dihydrosamidin (Ad)                   |                                                    | –                               | ?              | ?            | +           | ?               | ?          | –    | ?     | 0.15       | [116,117]  |
| Decursin (Grandivitin) (L)            |                                                    | –                               | ?              |              |             | 0.023           |            | –    | 7.617 | ?          | [119]      |
| Seselin (Ad)                          |                                                    | –                               | ?              |              |             | 0.009           |            | –    | ?     | ?          |            |
| (±)-Praeruptorin B (Anomalin) (Ad)    |                                                    | –                               | ?              |              |             | 0.116           |            | –    | ?     | ?          |            |

|                                                    |                                                |   |   |   |   |   |   |   |         |   |           |
|----------------------------------------------------|------------------------------------------------|---|---|---|---|---|---|---|---------|---|-----------|
| (-)-Praeruptorin B (Praeruptorin D, Anomalin) (Ad) | <i>Angelica anomala</i> Ave-Lall.              | + | ? | ? | ? | ? | ? | - | ?       | ? | [113]     |
| Decursin (Grandivitin) (L)                         | <i>Angelica acutiloba</i>                      | + | ? | ? | ? | ? | ? | - | ?       | ? | [41]      |
| Decursinol angelate (L)                            | (Siebold & Zucc.) Kitag.                       | + | ? | ? | ? | ? | ? | - | ?       | ? |           |
| (-)-Praeruptorin B (Praeruptorin D, Anomalin) (Ad) | <i>Angelica adzharica</i> Pimenov              | + | ? | ? | ? | ? | ? | - | ?       | ? | [113]     |
| Decursitin C (Andelin) (L)                         | <i>Angelica decursiva</i> (Miq.)               | + | ? | ? | ? | ? | ? | - | ?       | ? | [120,121] |
| (-)-3-(R)-Decursinol (Smirniol, Aegelinol) (L)     | Franch. & Sav.                                 | - | + | ? | ? | ? | ? | - | +       | ? | [121]     |
| (+)-trans-Decursidinol (L)                         |                                                | - | + | ? | ? | ? | ? | - | ?       | ? |           |
| (-)-cis-Decursidinol (L)                           |                                                | - | ? | ? | ? | ? | ? | - | +       | ? |           |
| 4-Hydroxy Pd-C-III (L)                             |                                                | - | + | ? | ? | ? | ? | - | ?       | ? |           |
| 4'-Methoxy Pd-C-I (L)                              |                                                | - | + | ? | ? | ? | ? | - | ?       | ? |           |
| Pd-C-I (L)                                         |                                                | - | + | ? | ? | ? | ? | - | ?       | ? |           |
| Pd-C-II (L)                                        |                                                | - | + | ? | ? | ? | ? | - | ?       | ? |           |
| Pd-C-III (L)                                       |                                                | - | + | ? | ? | ? | ? | - | ?       | ? |           |
| Pd-C-IV (L)                                        |                                                | - | ? | ? | ? | ? | ? | - | +       | ? |           |
| Pd-C-V (L)                                         |                                                | - | ? | ? | ? | ? | ? | - | +       | ? |           |
| Decursidin (L)                                     |                                                | - | + | ? | ? | ? | ? | - | ?       | ? |           |
| Decursin (Grandivitin) (L)                         |                                                | - | ? | ? | ? | ? | ? | - | +       | ? |           |
| AD-I (L)                                           |                                                | - | ? | ? | ? | ? | ? | - | +       | ? |           |
| AD-II (L)                                          |                                                | - | ? | ? | ? | ? | ? | - | +       | ? |           |
| (-)-Methyl-Decursidinol (L)                        |                                                | - | ? | ? | ? | ? | ? | - | +       | ? |           |
| Decursitin B (L)                                   |                                                | - | ? | ? | ? | ? | ? | - | +       | ? |           |
| Decursitin C (Andelin) (L)                         |                                                | - | ? | ? | ? | ? | ? | - | +       | ? |           |
| Decursitin D (L)                                   |                                                | - | ? | ? | ? | ? | ? | - | +       | ? |           |
| Pteryxin (Ad)                                      |                                                | - | + | ? | ? | ? | ? | - | ?       | ? |           |
| (3'R,4'S)-3'-acetyl-4'-Tigloylkhellactone (Ad)     |                                                | - | + | ? | ? | ? | ? | - | ?       | ? |           |
| Jatamansin (Selinidin, Xanthogalin) (Ad)           |                                                | - | ? | ? | ? | ? | ? | - | +       | ? |           |
| Peujaponisinol A (Ad)                              |                                                | - | ? | ? | ? | ? | ? | - | +       | ? |           |
| Peujaponisinol B (Ad)                              |                                                | - | ? | ? | ? | ? | ? | - | +       | ? |           |
| (-)-3-(R)-Decursinol (Smirniol, Aegelinol) (L)     | <i>Angelica gigas</i> Nakai                    | - | ? |   |   | + |   | - | ?       | ? | [122]     |
| (+)-Decursinol ((-)-Smirniol) (L)                  |                                                | - | ? |   |   | + |   | - | ?       | ? |           |
| Agasyllin (L)                                      |                                                | - | ? |   |   | + |   | - | ?       | ? |           |
| Xanthyletin (L)                                    |                                                | - | ? |   |   | + |   | - | ?       | ? | [123]     |
| Decursin (Grandivitin) (L)                         |                                                | - | ? | ? | ? | ? | ? | - | 2.7-4.7 | ? | [124]     |
| Decursinol angelate (L)                            |                                                | - | ? | ? | ? | ? | ? | - | 2.9-4.5 | ? |           |
| Jatamansin (Selinidin, Xanthogalin) (Ad)           | <i>Angelica purpurascens</i> (Ave-Lall.) Gilli | - | ? | ? | ? | ? | ? | - | +       | ? | [125]     |
| Xanthalin (L)                                      |                                                | - | ? | ? | ? | ? | ? | - | +       | ? |           |
| Agasillin (L)                                      |                                                | - | ? | ? | ? | ? | ? | - | +       | ? |           |
| (-)-Praeruptorin A (Isopteryxin) (Ad)              | <i>Angelica sachalinensis</i> Maxim.           | + | ? | ? | ? | ? | ? | - | ?       | ? | [113]     |
| Decursin (Grandivitin) (L)                         | <i>Angelica sinensis</i>                       | + | ? | ? | ? | ? | ? | - | ?       | ? | [41]      |
| Decursinol angelate (L)                            | (Oliv.) Diels                                  | + | ? | ? | ? | ? | ? | - | ?       | ? |           |
| (-)-Praeruptorin B (Praeruptorin D, Anomalin) (Ad) | <i>Angelica tatianae</i> Bordz.                | + | ? | ? | ? | ? | ? | - | ?       | ? | [113]     |
| Agasyllin (L)                                      | <i>Eryngium campestre</i> L.                   | - | ? | ? | ? | ? | ? | - | +       | ? | [126]     |
| Decursin (Grandivitin) (L)                         |                                                | - | ? | ? | ? | ? | ? | - | +       | ? |           |
| Aegelinol benzoate (L)                             |                                                | - | ? | ? | ? | ? | ? | - | +       | ? |           |
| (-)-3-(R)-Decursinol (Smirniol, Aegelinol) (L)     |                                                | - | ? | ? | ? | ? | ? | - | +       | ? |           |
| Grandivittin                                       | <i>Ferulago campestris</i>                     | - | ? | ? | ? | ? | ? | - | +       | ? | [33]      |

|                                                        |                                                                                          |   |   |   |   |   |   |   |   |   |       |
|--------------------------------------------------------|------------------------------------------------------------------------------------------|---|---|---|---|---|---|---|---|---|-------|
| Agasyllin                                              | (Besser) Grecescu                                                                        | – | ? | ? | ? | ? | ? | – | + | ? |       |
| Benzoyl aegelinol                                      |                                                                                          | – | ? | ? | ? | ? | ? | – | + | ? |       |
| Grandivittin                                           | <i>Ferulago macrocarpa</i> (Fenzl) Boiss.                                                | – | ? | ? | ? | ? | ? | – | ? | + | [127] |
| Buchtarkin (Ad)                                        | <i>Ferulopsis hystrix</i> (Bunge) Pimenov ( <i>Phlojodicarpus turczaninowii</i> Sipliv.) | + | ? | ? | ? | ? | ? | – | ? | ? | [113] |
| 3',4'-di-O-Isobutyryl-cis-khellactone (Ad)             | <i>Glehnia litoralis</i> F. Schmidt ex Miq.                                              | – | + | ? | ? | ? | ? | – | ? | ? | [128] |
| Samidin (Ad)                                           |                                                                                          | – | + | ? | ? | ? | ? | – | ? | ? |       |
| Dihydrosamidin (Ad)                                    |                                                                                          | – | + | ? | ? | ? | ? | – | ? | ? |       |
| cis-Khellactone disenecionate                          |                                                                                          | – | + | ? | ? | ? | ? | – | ? | ? |       |
| Khellactone 3'-O-isovaleroyl-4'-O senecioyl ester (Ad) |                                                                                          | – | + | ? | ? | ? | ? | – | ? | ? |       |
| Khellactone 3',4'-di-O-isovaleroyl (Ad)                |                                                                                          | – | + | ? | ? | ? | ? | – | ? | ? |       |
| Jatamansin (Selinidin, Xanthogalin) (Ad)               | <i>Ligusticum lucidum</i> Mill. subsp. <i>cuneifolium</i>                                | – | ? |   |   | + |   |   | ? | ? | [28]  |
| (±)-Praeruptorin A (Pd-Ia) (Ad)                        | (Guss.) Tammaro                                                                          | – | ? |   |   | + |   |   | ? | ? |       |
| Visnadin (Ad)                                          |                                                                                          | – | ? |   |   | + |   |   | ? | ? |       |
| (±)-Praeruptorin B (Anomalin) (Ad)                     | <i>Musineon divaricatum</i> (Pursh) Raf                                                  | – | + | ? | ? | ? | ? | – | ? | ? | [129] |
| d-Laserpitin (Peujaponisinol B, Isolehmannidin) (Ad)   |                                                                                          | – | + | ? | ? | ? | ? | – | ? | ? |       |
| Isolaserpetin (Ad)                                     |                                                                                          | – | + | ? | ? | ? | ? | – | ? | ? |       |
| Turgeniifolin C (Ad)                                   |                                                                                          | – | + | ? | ? | ? | ? | – | ? | ? |       |
| Isocampesol (Ad)                                       |                                                                                          | – | + | ? | ? | ? | ? | – | ? | ? |       |
| Pteryxin (Ad)                                          |                                                                                          | – | + | ? | ? | ? | ? | – | ? | ? |       |
| Isosamidin (Ad)                                        |                                                                                          | – | + | ? | ? | ? | ? | – | ? | ? |       |
| Suksdorfin (Ad)                                        |                                                                                          | – | + | ? | ? | ? | ? | – | ? | ? |       |
| Khellactone 4'-O-isovaleroyl ester (Ad)                |                                                                                          | – | + | ? | ? | ? | ? | – | ? | ? |       |
| Praeruptorin E (Ad)                                    |                                                                                          | – | + | ? | ? | ? | ? | – | ? | ? |       |
| Khellactone-3'-O-isobutyryl ester (Ad)                 |                                                                                          | – | + | ? | ? | ? | ? | – | ? | ? |       |
| Khellactone 3'-O-angeloyl-4'-O isobutyryl ester (Ad)   |                                                                                          | – | + | ? | ? | ? | ? | – | ? | ? |       |
| Khellactone 4'-O- 2-methylbutyroyl ester (Ad)          |                                                                                          | – | + | ? | ? | ? | ? | – | ? | ? |       |
| Khellactone 3'-O-tigloyl ester (Ad)                    |                                                                                          | – | + | ? | ? | ? | ? | – | ? | ? |       |
| Calypteryxin (Peuformosin) (Ad)                        |                                                                                          | – | + | ? | ? | ? | ? | – | ? | ? |       |
| Khellactone 3'-O-senecioyl-4'-O angeloyl ester (Ad)    |                                                                                          | – | + | ? | ? | ? | ? | – | ? | ? |       |
| Khellactone (Ad)                                       |                                                                                          | – | + | ? | ? | ? | ? | – | ? | ? |       |
| Jatamansin (Selinidin, Xanthogalin) (Ad)               |                                                                                          | – | + | ? | ? | ? | ? | – | ? | ? |       |
| (–)-Methyl-Decursidinol (L)                            | <i>Peucedanum arenarium</i>                                                              | – | ? | ? | ? | ? | ? | – | + | ? | [130] |
| Decursitin B (L)                                       | Waldst. & Kit.                                                                           | – | ? | ? | ? | ? | ? | – | + | ? |       |
| Peuarenine (L)                                         |                                                                                          | – | ? | ? | ? | ? | ? | – | + | ? |       |
| Peuarin (L)                                            |                                                                                          | – | ? | ? | ? | ? | ? | – | + | ? |       |
| Peuarenarine (L)                                       |                                                                                          | – | ? | ? | ? | ? | ? | – | + | ? |       |
| Peuchlorin (L)                                         |                                                                                          | – | ? | ? | ? | ? | ? | – | + | ? |       |
| Peuchlorinin butyroyl isohellaktone (L)                |                                                                                          | – | ? | ? | ? | ? | ? | – | + | ? |       |
| Peuchloridin (L)                                       |                                                                                          | – | ? | ? | ? | ? | ? | – | + | ? |       |

|                                                               |                                                         |   |   |   |   |   |   |   |   |   |           |
|---------------------------------------------------------------|---------------------------------------------------------|---|---|---|---|---|---|---|---|---|-----------|
| Decursidin (L)                                                | <i>Peucedanum decursivum</i>                            | — | ? | ? | ? | ? | ? | — | + | ? | [131]     |
| Pd-C-IV (L)                                                   | (Miq.) Maxim                                            | — | ? | ? | ? | ? | ? | — | + | ? |           |
| Pd-C-V (L)                                                    |                                                         | — | ? | ? | ? | ? | ? | — | + | ? |           |
| Decursitin C (Andelin) (L)                                    |                                                         | — | ? | ? | ? | ? | ? | — | + | ? | [130]     |
| Dihydroxanthyletin (L)                                        |                                                         | — | ? | ? | ? | ? | ? | — | + | ? | [130]     |
| (+)- <i>trans</i> -Decursidinol (L)                           |                                                         | — | ? | ? | ? | ? | ? | — | + | ? |           |
| 3'(S)-Acetoxy-4'(R)-angeloyloxy-3', 4'-dihydroxanthyletin (L) |                                                         | — | ? | ? | ? | ? | ? | — | + | ? |           |
| Decursitin B (L)                                              |                                                         | — | ? | ? | ? | ? | ? | — | + | ? |           |
| Decursitin (L)                                                |                                                         | — | ? | ? | ? | ? | ? | — | + | ? |           |
| Decursitin D (L)                                              |                                                         | — | ? | ? | ? | ? | ? | — | + | ? |           |
| Decursitin F (L)                                              |                                                         | — | ? | ? | ? | ? | ? | — | + | ? |           |
| Pd-C-III (L)                                                  |                                                         | — | ? | ? | ? | ? | ? | — | + | ? |           |
| (-)-Praeruptorin B (Praeruptorin D, Anomalin) (Ad)            | <i>Peucedanum delavayi</i> Franch.                      | — | ? | ? | ? | ? | ? | — | + | ? | [130]     |
| 3'(R)-O-β-D-Glucopyranosyl-3',4'-dihydroxanthyletin (L)       | <i>Peucedanum dissolutum</i> (Diels) H. Wolff           | — | ? | ? | ? | ? | ? | — | + | ? | [130]     |
| (-)-Praeruptorin A (Isopteryxin) (Ad)                         |                                                         | — | ? | ? | ? | ? | ? | — | + | ? |           |
| (-)- <i>cis</i> -Khellactone (Ad)                             | <i>Peucedanum formosanum</i>                            | — | ? | ? | ? | ? | ? | — | + | ? | [130]     |
| (-)-Praeruptorin B (Praeruptorin D, Anomalin) (Ad)            | Hayata                                                  | — | ? | ? | ? | ? | ? | — | + | ? |           |
| Isosamidin (Ad)                                               |                                                         | — | ? | ? | ? | ? | ? | — | + | ? |           |
| Corymbocoumarin (Ad)                                          |                                                         | — | ? | ? | ? | ? | ? | — | + | ? |           |
| Dihydroxanthyletin (L)                                        | <i>Peucedanum harry-smithii</i>                         | — | ? | ? | ? | ? | ? | — | + | ? | [130]     |
| Calypteryxin (Peuformosin) (Ad)                               | <i>var. subglabrum</i> (Shan & M.L. Sheh)               | — | ? | ? | ? | ? | ? | — | + | ? |           |
| (±)-Praeruptorin A (Pd-Ia) (Ad)                               | Shan & M.L. Sheh                                        | — | ? | ? | ? | ? | ? | — | + | ? |           |
| (-)-Praeruptorin B (Praeruptorin D, Anomalin) (Ad)            |                                                         | — | ? | ? | ? | ? | ? | — | + | ? |           |
| Longshengensis A (Ad)                                         | <i>Peucedanum longshengense</i> R. H. Shan & M. L. Sheh | — | ? | ? | ? | ? | ? | — | + | ? | [130]     |
| (+)- <i>trans</i> -Khellactone (Ad)                           | <i>Peucedanum japonicum</i>                             | — | ? |   |   | + |   | — | ? | ? | [132]     |
| (+)- <i>trans</i> -4'-Acetyl-3'-tigloylkhellactone (Ad)       | Thunb.                                                  | — | ? |   |   | + |   | — | ? | ? |           |
| (+)-Praeruptorin A (Ad)                                       |                                                         | — | ? |   |   | + |   | — | ? | ? |           |
| 3'(S),'(S)-diisovaleryloxy-3',4'-dihydroseselin (Ad)          |                                                         | — | + |   |   | + |   | — | + | ? | [130,133] |
| 3'(S),4'(S)-diseneciyoxy-3',4'-dihydroseselin (Ad)            |                                                         | — | ? | ? | ? | ? | ? | — | + | ? | [133]     |
| (+)-Samidin (Ad)                                              |                                                         | — | ? | ? | ? | ? | ? | — | + | ? |           |
| Peujaponisin (Ad)                                             |                                                         | — | ? | ? | ? | ? | ? | — | + | ? |           |
| (-)-Visnadin (Ad)                                             |                                                         | — | ? | ? | ? | ? | ? | — | + | ? |           |
| (-)-Praeruptorin B (Praeruptorin D, Anomalin) (Ad)            |                                                         | — | ? | ? | ? | ? | ? | — | + | ? |           |
| (-)- <i>cis</i> -Khellactone (Ad)                             |                                                         | — | ? | ? | ? | ? | ? | — | + | ? |           |
| (-)- <i>trans</i> -Khellactone (Ad)                           |                                                         | — | ? | ? | ? | ? | ? | — | + | ? |           |
| (-)- <i>cis</i> -Ethylkhellactone (Ad)                        |                                                         | — | ? | ? | ? | ? | ? | — | + | ? |           |
| (+)- <i>trans</i> -Ethylkhellactone (Ad)                      |                                                         | — | ? | ? | ? | ? | ? | — | + | ? |           |
| 3'(S)-Sensciyoxy-4' (S)-ethoxy-3',4'-dihydroseselin (Ad)      |                                                         | — | ? | ? | ? | ? | ? | — | + | ? |           |
| Peucedanocoumarin I (Ad)                                      |                                                         | — | ? | ? | ? | ? | ? | — | + | ? |           |
| Peujaponisinol A (Ad)                                         |                                                         | — | ? | ? | ? | ? | ? | — | + | ? | [134]     |
| Peujaponisinol B (Ad)                                         |                                                         | — | ? | ? | ? | ? | ? | — | + | ? |           |
| (±)- <i>cis</i> -3'-Acetyl-4'-Tigloylkhellactone (Ad)         |                                                         | — | ? |   |   | + |   | — | ? | ? | [130]     |
| (-)- <i>trans</i> -3'-Acetyl-4'-                              |                                                         | — | ? |   |   | + |   | — | ? | ? |           |

|                                                                |                                                            |   |   |   |   |   |   |   |   |
|----------------------------------------------------------------|------------------------------------------------------------|---|---|---|---|---|---|---|---|
| seneciolykhellactone (Ad)                                      |                                                            |   |   |   |   |   |   |   |   |
| <i>cis</i> -3'-isovaleryl-4'                                   | –                                                          | ? |   |   | + |   | – | ? | ? |
| -seneciolykhellactone (Ad)                                     |                                                            |   |   |   |   |   |   |   |   |
| Peucedanocoumarin III (Ad)                                     | –                                                          | ? | ? | ? | ? | ? | – | + | ? |
| (±)-Praeruptorin A (Pd-Ia) (Ad)                                | –                                                          | ? | ? | ? | ? | ? | – | + | ? |
| Pteryxin (Ad)                                                  | –                                                          | ? | ? | ? | ? | ? | – | + | ? |
| Jatamansin (Selinidin,                                         | –                                                          | ? | ? | ? | ? | ? | – | + | ? |
| Xanthogalin) (Ad)                                              |                                                            |   |   |   |   |   |   |   |   |
| (±)-4'-Tigloylkhellactone (Ad)                                 | –                                                          | ? | ? | ? | ? | ? | – | + | ? |
| Praeroside II (Ad)                                             | –                                                          | ? | ? | ? | ? | + | – | ? | ? |
| Praeroside III (Ad)                                            | –                                                          | ? | ? | ? | ? | + | – | ? | ? |
| Praeroside IV (Ad)                                             | –                                                          | ? | ? | ? | ? | + | – | ? | ? |
| Praeroside V (Ad)                                              | –                                                          | ? | ? | ? | ? | + | – | ? | ? |
| Peucedanocoumarin III (Ad)                                     | <i>Peucedanum medium var. gracile</i> Dunn ex Shan et Sheh | – | ? | ? | ? | ? | – | + | ? |
| Peucedanocoumarin III (Ad)                                     | <i>Peucedanum ostruthium</i> (L.) W.D.J. Koch—Masterwort   | – | ? | ? | ? | ? | – | + | ? |
| (±)-Praeruptorin A (Pd-Ia) (Ad)                                | <i>Peucedanum praeruptorum</i>                             | – | ? | ? | ? | ? | – | + | ? |
| (±)-Praeruptorin B (Anomalin) (Ad)                             | Dunn                                                       | – | ? | ? | ? | ? | – | + | ? |
| Jatamansin (Selinidin,                                         |                                                            | – | ? | ? | ? | ? | – | + | ? |
| Xanthogalin) (Ad)                                              |                                                            |   |   |   |   |   |   |   |   |
| 3'(S),'(S)-diisovaleryloxy-3',4'-dihydroseselin (Ad)           |                                                            | – | ? | ? | ? | ? | – | + | ? |
| Calyptryxin (Peuformosin) (Ad)                                 |                                                            | – | ? | ? | ? | ? | – | + | ? |
| (+)-Praeruptorin A (Ad)                                        |                                                            | – | ? | ? | ? | ? | – | + | ? |
| (+)-Praeruptorin B (Pd-II, ((+)-Anomalin, Praeruptorin C) (Ad) |                                                            | – | ? | ? | ? | ? | – | + | ? |
| (–)-Praeruptorin A (Isopteryxin) (Ad)                          |                                                            | – | ? | ? | ? | ? | – | + | ? |
| (–)-Praeruptorin B (Praeruptorin D, Anomalin) (Ad)             |                                                            | – | ? | ? | ? | ? | – | + | ? |
| (+)-Praeruptorin E (Pd-III) (Ad)                               |                                                            | – | ? | ? | ? | ? | – | + | ? |
| Turgeniifolin A (Pd-Ib) (Ad)                                   |                                                            | – | ? | ? | ? | ? | – | + | ? |
| Quanhuocoumarin I (Ad)                                         |                                                            | – | ? | ? | ? | ? | – | + | ? |
| (3'R,4'S)-3'-acetyl-4'-Tigloylkhellactone (Ad)                 |                                                            | – | ? | ? | ? | ? | – | + | ? |
| Pteryxin (Ad)                                                  |                                                            | – | ? | ? | ? | ? | – | + | ? |
| (3'S,4'R)-3'-acetyl-4'-Isobutyrylkhellactone (Ad)              |                                                            | – | ? | ? | ? | ? | – | + | ? |
| Peucedanocoumarin I (Ad)                                       |                                                            | – | ? | ? | ? | ? | – | + | ? |
| Peucedanocoumarin II (Ad)                                      |                                                            | – | ? | ? | ? | ? | – | + | ? |
| Peucedanocoumarin III (Ad)                                     |                                                            | – | ? | ? | ? | ? | – | + | ? |
| (+)-Praeruptorin E                                             |                                                            | – | ? | ? | ? | ? | – | + | ? |
| (Qianhuocoumarin H, Pd-III) (Ad)                               |                                                            |   |   |   |   |   |   |   |   |
| (3'R,4'S)-3'-angeloylkhellactone (Ad)                          |                                                            | – | ? | ? | ? | ? | – | + | ? |
| Qianhuocoumarin A (Ad)                                         |                                                            | – | ? | ? | ? | ? | – | + | ? |
| Qianhuocoumarin B (Ad)                                         |                                                            | – | ? | ? | ? | ? | – | + | ? |
| Qianhuocoumarin C (Ad)                                         |                                                            | – | ? | ? | ? | ? | – | + | ? |
| Qianhuocoumarin D (Ad)                                         |                                                            | – | ? | ? | ? | ? | – | + | ? |
| Qianhuocoumarin E (Ad)                                         |                                                            | – | ? | ? | ? | ? | – | + | ? |
| (+)-Laserpitin (Ad)                                            |                                                            | – | ? | ? | ? | ? | – | + | ? |
| Qianhuocoumarin J (Ad)                                         |                                                            | – | ? | ? | ? | ? | – | + | ? |
| <i>cis</i> -Khellactone disenecionate (Ad)                     |                                                            | – | ? | ? | ? | ? | – | + | ? |

|                                                                                                    |                                                                      |   |   |   |   |   |   |   |   |   |          |
|----------------------------------------------------------------------------------------------------|----------------------------------------------------------------------|---|---|---|---|---|---|---|---|---|----------|
| Hyuganin D (Seravshanin, Isobocconin) (Ad)                                                         |                                                                      | – | ? | ? | ? | ? | ? | – | + | ? |          |
| <i>trans</i> -Khellactone (Ad)                                                                     |                                                                      | – | ? | ? | ? | ? | ? | – | + | ? |          |
| <i>cis</i> -Khellactone (Ad)                                                                       |                                                                      | – | ? | ? | ? | ? | ? | – | + | ? |          |
| 3'-Acetyl-4'-isovalerylkhellactone (Ad)                                                            |                                                                      | – | ? | ? | ? | ? | ? | – | + | ? |          |
| <i>cis</i> -3'-Senecieryl-4'-angeloylkhellactone (Ad)                                              |                                                                      | – | ? | ? | ? | ? | ? | – | + | ? |          |
| Khellactone 3',4'-di- <i>O</i> -isovaleroyl (Ad)                                                   |                                                                      | – | ? | ? | ? | ? | ? | – | + | ? |          |
| 3'-Isovaleryl-4'-keto-khellactone (Petracoumarin) (Ad)                                             |                                                                      | – | ? | ? | ? | ? | ? | – | + | ? |          |
| 3'-Angeloyl-4'-Propionylkhellactone (Ad)                                                           |                                                                      | – | ? | ? | ? | ? | ? | – | + | ? |          |
| Praeroside II (Ad)                                                                                 |                                                                      | – | ? | ? | ? | ? | ? | – | + | ? |          |
| Praeroside III (Ad)                                                                                |                                                                      | – | ? | ? | ? | ? | ? | – | + | ? |          |
| Praeroside IV (Ad)                                                                                 |                                                                      | – | ? | ? | ? | ? | ? | – | + | ? |          |
| Praeroside V (Ad)                                                                                  |                                                                      | – | ? | ? | ? | ? | ? | – | + | ? |          |
| <i>cis</i> -3'-Isovaleryl-4'-seneciylkhellactone (Ad)                                              |                                                                      | – | ? | ? | ? | ? | ? | – | + | ? |          |
| <i>cis</i> -3'-Isobutyryl-4'-acetylkhellactone (Ad)                                                |                                                                      | – | ? | ? | ? | ? | ? | – | + | ? |          |
| Decursin (Grandivitin) (L)                                                                         | <i>Peucedanum terebinthaceum</i>                                     | – | ? | ? | ? | ? | ? | – | + | ? | [130]    |
| Pteryxin (Ad)                                                                                      | <i>var. deltoideum</i> (Makino ex K.Yabe) Makino                     | – | ? | ? | ? | ? | ? | – | + | ? |          |
| Turgeniifolin A (Pd-Ib) (Ad)                                                                       | <i>Peucedanum turgeniifolium</i>                                     | – | + | ? | ? | ? | ? | – | ? | ? | [130]    |
| Hystrixarin (Turgeniifolin B) (Ad)                                                                 | H. Wolff                                                             | – | + | ? | ? | ? | ? | – | ? | ? |          |
| Turgeniifolin C (Ad)                                                                               |                                                                      | – | + | ? | ? | ? | ? | – | ? | ? |          |
| 3'(S)-Acetoxy-4'(R)-angeloyloxy-3', 4'-dihydroxanthyletin (L)                                      | <i>Peucedanum wawrii</i> (Wolff) Su By                               | – | ? | ? | ? | ? | ? | – | + | ? | [137]    |
| 3'(R)-Acetoxy-4'(S)-angeloyloxy-3',4'-dihydroseselin (Ad)                                          |                                                                      | – | ? | ? | ? | ? | ? | – | + | ? |          |
| (+)-Decursinol ((–)-Smirniol) (L)                                                                  | <i>Peucedanum wulongense</i> R.                                      | – | ? | ? | ? | ? | ? | – | + | ? | [130]    |
| (+)- <i>trans</i> -Khellactone (Ad)                                                                | H. Shan & M. L. Sheh                                                 | – | ? | ? | ? | ? | ? | – | + | ? |          |
| 3'(S),4'(S)-Diseneciyoxy-3',4'-dihydroseselin (Ad)                                                 |                                                                      | – | ? | ? | ? | ? | ? | – | + | ? |          |
| (–)-Praeruptorin B (Praeruptorin D, Anomalin) (Ad)                                                 |                                                                      | – | ? | ? | ? | ? | ? | – | + | ? |          |
| Praeruptorin E (Ad)                                                                                | <i>Peucedanum zenkeri</i> L.                                         | – | ? | ? | ? | ? | ? | – | ? | + | [130]    |
| Dihydrosamidin (Ad)                                                                                | <i>Phlojodicarpus villosus</i> (Turcz. ex Fisch. et C.A. Mey.) Ledeb | – | ? | ? | ? | ? | ? | – | 2 | ? | [138]    |
| Decursin (Grandivitin) (L)                                                                         |                                                                      | + | ? | ? | ? | ? | ? | – | ? | ? | [113]    |
| (–)-Decursinol (Smirniol, Aegelinol) (L)                                                           |                                                                      | + | ? | ? | ? | ? | ? | – | ? | ? |          |
| Visnadin (Ad)                                                                                      |                                                                      | + | ? | ? | ? | ? | ? | – | ? | ? |          |
| Khellactone (Visnagan) (Ad)                                                                        | <i>Phlojodicarpus sibiricus</i>                                      | – | ? | ? | ? | ? | ? | – | + | ? | [51,139] |
| Khellactone 4'- <i>O</i> -methyl ester (Ad)                                                        | (Steph. ex Spreng.) K.-Pol.                                          | – | ? | ? | ? |   | + | – | ? | + |          |
| Khellactone 4'- <i>O</i> -isovaleroyl ester / khellactone 4'- <i>O</i> -2-methylbutyryl ester (Ad) |                                                                      | – | ? | ? | ? | ? | ? | – | + | ? |          |
| Khellactone 4'- <i>O</i> -acetyl ester (Ad)                                                        |                                                                      | – | ? | ? | ? |   | + | – | ? | + |          |
| Lomatin <i>O</i> -isovaleroyl ester / lomatin 2-methylbutyryl ester (Ad)                           |                                                                      | – | ? | ? | ? | ? | ? | – | + | ? |          |



|                                                                                                                |   |   |   |   |        |   |       |       |
|----------------------------------------------------------------------------------------------------------------|---|---|---|---|--------|---|-------|-------|
| Khellactone 3',4'-di-O-acetyl ester (Ad)                                                                       | – | ? | + | ? | +      | – | 0.252 | +     |
| Khellactone 4'-O-isobutyroyl ester (Ad)                                                                        | – | ? | ? | ? | ?      | – | +     | ?     |
| <i>d</i> -Laserpitin (Peujaponisinol B, Isolehmannidin) (Ad)                                                   | – | ? | ? | ? | 0.1251 | – | 0.47  | 0.214 |
| Hyuganin D (Seravshanin, Isobocconin) (Ad)                                                                     | – | ? | + | ? | +      | – | 0.149 | 0.01  |
| Pteryxin (Ad)                                                                                                  | – | ? | ? | ? | ?      | – | +     | ?     |
| Dihydrosamidin (Ad)                                                                                            | – | ? | + | ? | 1.085  | – | 8.014 | 1.228 |
| Suksdorfin (Ad)                                                                                                | – | ? | ? | ? | ?      | – | +     | ?     |
| Hyuganin C (Ad)                                                                                                | – | ? | ? | ? | +      | – | 0.053 | +     |
| <i>cis</i> -Khellactone disenecionate (Ad)                                                                     | – | ? | ? | ? | ?      | – | +     | ?     |
| (–)-Praeruptorin B (Praeruptorin D, Anomalin) (Ad)                                                             | – | ? | + | ? | ?      | – | +     | ?     |
| Khellactone 3'-O-isovaleroyl-4'-O-seneciroyl ester / Khellactone 3'-O-2-methylbutyroyl-4'-O-seneciroyl ester / | – | ? | ? | ? | ?      | – | +     | ?     |
| Khellactone 3'-O-isovaleroyl-4'-O-angeloyl ester /                                                             |   |   |   |   |        |   |       |       |
| Khellactone 3'-O-isovaleroyl-4'-O-angeloyl ester (Ad)                                                          |   |   |   |   |        |   |       |       |
| Khellactone 3'-O-isovaleroyl-4'-O-isobuturoyl ester /                                                          | – | ? | ? | ? | ?      | – | +     | ?     |
| Khellactone 3'-O-2-methylbutyroyl-4'-O-isobuturoyl ester (Ad)                                                  |   |   |   |   |        |   |       |       |
| Khellactone 3'-O-seneciroyl-4'-O-isovaleroyl ester /                                                           | – | ? | ? | ? | ?      | – | +     | ?     |
| Khellactone 3'-O-seneciroyl-4'-O-2-methylbutyroyl ester /                                                      |   |   |   |   |        |   |       |       |
| Praeruptorin E /                                                                                               |   |   |   |   |        |   |       |       |
| Khellactone 3'-O-angeloyl-4'-O-2-methylbutyroyl ester (Ad)                                                     |   |   |   |   |        |   |       |       |
| Khellactone 3',4'-di-O-isovaleroyl / Khellactone 3',4'-di-O-2-methylbutyroyl ester /                           | – | ? | ? | ? | ?      | – | +     | ?     |
| Khellactone isovaleroyl-2-methylbutyroyl ester (Ad)                                                            |   |   |   |   |        |   |       |       |
| Khellactone 3',4'-di-O-isobutyroyl ester (Ad)                                                                  | – | ? | ? | ? | ?      | – | +     | ?     |
| Khellactone-4'-O-glucoside                                                                                     | – | ? | ? | ? | +      | – | +     | ?     |
| Campestrinoside (Praeroside II) (Ad)                                                                           | – | ? | + | ? | 1.059  | – | 0.139 | 0.046 |
| Khellactone O-isobutyryl Ester (Ad)                                                                            | – | ? | ? | ? | +      | – | ?     | ?     |
| Khellactone O-hexoside (Ad)                                                                                    | – | ? | ? | ? | +      | – | ?     | ?     |
| Khellactone 3'-O-methyl Ester (Ad)                                                                             | – | ? | ? | ? | +      | – | ?     | ?     |
| 3',4'-Di-O-isobutyryl- <i>cis</i> -khellactone (Ad)                                                            | – | ? | + | ? | ?      | – | ?     | ?     |

|                                                                 |                                                                                                                                   |   |   |   |   |   |   |   |   |   |       |
|-----------------------------------------------------------------|-----------------------------------------------------------------------------------------------------------------------------------|---|---|---|---|---|---|---|---|---|-------|
| 3'(R)-Acetoxy-4'(S)- propionyloxy<br>-3',4'-dihydroseselin (Ad) | <i>Prionosciadium watsonii</i><br>J.M. Coult. & Rose                                                                              | + | ? | ? | ? | ? | ? | — | ? | ? | [140] |
| Khellactone 4'-O-isobutyroyl ester<br>(Ad)                      |                                                                                                                                   | + | ? | ? | ? | ? | ? | — | ? | ? |       |
| Isolaserpetin (Ad)                                              |                                                                                                                                   | + | ? | ? | ? | ? | ? | — | ? | ? |       |
| Hyuganin D (Seravshanin,<br>Isobocconin) (Ad)                   |                                                                                                                                   | + | ? | ? | ? | ? | ? | — | ? | ? |       |
| Khellactone 3',4'-di-O-acetyl ester<br>(Ad)                     |                                                                                                                                   | + | ? | ? | ? | ? | ? | — | ? | ? |       |
| (-)-trans-Khellactone (cis-<br>Khellactone; Visnagan) (Ad)      |                                                                                                                                   | + | ? | ? | ? | ? | ? | — | ? | ? |       |
| Khellactone 4'-O-methyl ester<br>(Ad)                           |                                                                                                                                   | + | ? | ? | ? | ? | ? | — | ? | ? |       |
| Jatamansin (Selinidin,<br>Xanthogalin) (Ad)                     |                                                                                                                                   | + | ? | ? | ? | ? | ? | — | ? | ? |       |
| Khellactone 3'-O- isobutyryl ester<br>(Ad)                      |                                                                                                                                   | + | ? | ? | ? | ? | ? | — | ? | ? |       |
| Lomatin (Ad)                                                    |                                                                                                                                   | + | ? | ? | ? | ? | ? | — | ? | ? |       |
| (+)-Decursinol ((-)-Smirniol)                                   | <i>Saposhnikovia divaricata</i>                                                                                                   | — | ? | ? | ? | ? | ? | — | + | ? | [43]  |
| (-)-Praeruptorin B (Praeruptorin<br>D, Anomalin)                | (Turcz.) Schischk.                                                                                                                | — | ? | ? | ? | ? | ? | — | + | ? |       |
| Calypteryxin (Peuformosin) (Ad)                                 | <i>Seseli arenarium</i> M. Bieb.                                                                                                  | — | ? | ? | ? | ? | ? | — | + | ? | [141] |
| Isosamidin (Ad)                                                 | ( <i>Seseli campestre</i> Bess.)                                                                                                  | — | ? | ? | ? | ? | ? | — | + | ? |       |
| Campestrinoside (Praeroside II)<br>(Ad)                         |                                                                                                                                   | — | ? | ? | ? | ? | ? | — | + | ? | [142] |
| (-)-trans-Khellactone (Ad)                                      |                                                                                                                                   | — | ? | ? | ? | ? | ? | — | + | ? |       |
| Campestrol (Ad)                                                 |                                                                                                                                   | — | ? | ? | ? | ? | ? | — | + | ? |       |
| Campestrinol (Ad)                                               |                                                                                                                                   | — | ? | ? | ? | ? | ? | — | + | ? |       |
| Isocampesol (Ad)                                                |                                                                                                                                   | — | ? | ? | ? | ? | ? | — | + | ? |       |
| Isocalypteryxin (Ad)                                            |                                                                                                                                   | — | ? | ? | ? | ? | ? | — | + | ? |       |
| Isolaserpetin (Ad)                                              |                                                                                                                                   | — | ? | ? | ? | ? | ? | — | + | ? |       |
| 3'-Acetoxy-4'-metyl-3',4'-<br>dihydroseselin (Ad)               |                                                                                                                                   | — | ? | ? | ? | ? | ? | — | + | ? |       |
| (-)-Praeruptorin B (Ad)                                         |                                                                                                                                   | + | ? | ? | ? | ? | ? | — | ? | ? | [113] |
| (-)-Praeruptorin B (Ad)                                         | <i>Seseli asperulum</i> (Trautv.)<br>Schischk.                                                                                    | + | ? | ? | ? | ? | ? | — | ? | ? | [113] |
| Pteryxin (Ad)                                                   | <i>Seseli condensatum</i> (L.)<br>Rchb. f. ( <i>Libanotis</i><br><i>condensata</i> ssp. <i>arctica</i><br>(Rupr.) V.G. Sergienko) | + | ? | ? | ? | ? | ? | — | ? | ? | [143] |
| Isofloroselin (Ad)                                              | <i>Seseli coronatum</i> Ledeb.                                                                                                    | + | ? | ? | ? | ? | ? | — | ? | ? | [144] |
| (-)-Praeruptorin B (Ad)                                         |                                                                                                                                   | + | ? | ? | ? | ? | ? | — | ? | ? | [113] |
| cis-Khellactone (Ad)                                            | <i>Seseli devenyense</i> Simonk.                                                                                                  | — | ? | ? | ? | ? | ? | — | ? | + | [60]  |
| d-Laserpitin (Peujaponisinol B,<br>Isolehmannidin) (Ad)         |                                                                                                                                   | — | ? | ? | ? | ? | ? | — | ? | + |       |
| Isolaserpetin (Ad)                                              |                                                                                                                                   | — | ? | ? | ? | ? | ? | — | ? | + |       |
| 3'-Capryloyloxyxanthogalol<br>(Octanoyllomatin) (Ad)            |                                                                                                                                   | — | ? | ? | ? | ? | ? | — | ? | + |       |
| (-)-Praeruptorin B (Ad)                                         | <i>Seseli dichotomum</i> Pall. ex<br>M.Bieb.                                                                                      | + | ? | ? | ? | ? | ? | — | ? | ? | [113] |
| (-)-Praeruptorin B (Ad)                                         | <i>Seseli incanum</i> (Stephan ex<br>Willd.) B. Fedtsch.                                                                          | + | ? | ? | ? | ? | ? | — | ? | ? | [113] |
| cis-Khellactone disenecionate (Ad)                              |                                                                                                                                   | + | ? | ? | ? | ? | ? | — | ? | ? |       |
| (-)-Praeruptorin B (Ad)                                         | <i>Seseli iliense</i> Lipsky                                                                                                      | + | ? | ? | ? | ? | ? | — | ? | ? | [113] |
| Pteryxin (Ad)                                                   | <i>Seseli jomuticum</i> Schischk.                                                                                                 | + | ? | ? | ? | ? | ? | — | ? | ? | [143] |
| Decursin (Grandivitin) (L)                                      | <i>Seseli grandivittatum</i>                                                                                                      | + | ? | ? | ? | ? | ? | — | ? | ? | [113] |

|                                                              |                                                                                             |   |   |   |   |   |   |   |   |      |       |
|--------------------------------------------------------------|---------------------------------------------------------------------------------------------|---|---|---|---|---|---|---|---|------|-------|
| (-)-3-(R)-Decursinol (L)                                     | (Sommier & Levier)                                                                          | + | ? | ? | ? | ? | ? | — | ? | ?    |       |
| Decursinol angelate (L)                                      | Schischk.                                                                                   | + | ? | ? | ? | ? | ? | — | ? | ?    |       |
| (-)-Praeruptorin B (Praeruptorin D, Anomalin) (Ad)           |                                                                                             | + | ? | ? | ? | ? | ? | — | ? | ?    |       |
| Corymbocoumarin (Ad)                                         | <i>Seseli gummiferum</i> Pall. ex Sm. subsp. <i>corymbosum</i> (Boiss. & Heldr.) P.H. Davis | + | ? | ? | ? | ? | ? | — | ? | ?    | [26]  |
| Pteryxin (Ad)                                                | <i>Seseli mucronatum</i> (Schrenk) Pimenov & Sdobnina                                       | + | ? | ? | ? | ? | ? | — | ? | ?    | [143] |
| Pteryxin (Ad)                                                | <i>Seseli nemorosum</i> Pimenov                                                             | + | ? | ? | ? | ? | ? | — | ? | ?    | [143] |
| <i>d</i> -Laserpitin (Peujaponisinol B, Isolehmannidin) (Ad) | <i>Seseli lehmannianum</i> (Bunge) Boiss. ( <i>Libanotis lehmanniana</i> Bunge)             | + | ? | ? | ? | ? | ? | — | ? | ?    | [113] |
| <i>cis</i> -Khellactone (Ad)                                 |                                                                                             | + | ? | ? | ? | ? | ? | — | ? | ?    |       |
| Lomatin (Ad)                                                 |                                                                                             | + | ? | ? | ? | ? | ? | — | ? | ?    |       |
| 3'-Capryloyloxyxanthogalol (Octanoyllomatin) (Ad)            |                                                                                             | + | ? | ? | ? | ? | ? | — | ? | ?    |       |
| 3'-Angeloyloxy-4'-butoxy-3',4'-dihydroseselin (Ad)           |                                                                                             | + | ? | ? | ? | ? | ? | — | ? | ?    |       |
| Pteryxin (Ad)                                                |                                                                                             | + | ? | ? | ? | ? | ? | — | ? | ?    | [143] |
| 3'-Isovaleryl-4'-keto-khellactone (Petracoumarin) (Ad)       | <i>Seseli petraeum</i> M. Bieb.                                                             | — | ? |   |   | + |   | — | ? | [61] |       |
| 3'-Capryloyloxyxanthogalol (Octanoyllomatin) (Ad)            |                                                                                             | — | ? |   |   | + |   | — | ? |      |       |
| Jatamansin (Selinidin, Xanthogalin) (Ad)                     |                                                                                             | — | ? |   |   | + |   | — | ? |      |       |
| (-)-Praeruptorin B (Praeruptorin D, Anomalin) (Ad)           |                                                                                             | — | ? |   |   | + |   | — | ? |      |       |
| Khellactone 3'-O- isobutyryl ester (Ad)                      |                                                                                             | — | ? |   |   | + |   | — | ? |      |       |
| Praeruptorin E (Ad)                                          |                                                                                             | — | ? |   |   | + |   | — | ? |      |       |
| Khellactone 3'-O-isovaleroyl-4'-O angeloyl ester             |                                                                                             | — | ? |   |   | + |   | — | ? |      |       |
| Khellactone 3'-O-seneciroyl-4'-O angeloyl ester              |                                                                                             | — | ? |   |   | + |   | — | ? |      |       |
| Samidin                                                      |                                                                                             | — | ? |   |   | + |   | — | ? |      |       |
| Peujaponisinol B                                             |                                                                                             | — | ? |   |   | + |   | — | ? |      |       |
| Peujaponisinol A                                             |                                                                                             | — | ? |   |   | + |   | — | ? |      |       |
| <i>cis</i> -Khellactone                                      |                                                                                             | — | ? |   |   | + |   | — | ? |      |       |
| Seseloside (L)                                               | <i>Seseli peucedanoides</i> (M. Bieb.) Koso-Pol.                                            | + | ? | ? | ? | ? | ? | — | ? | ?    | [145] |
| (-)-Praeruptorin B (Praeruptorin D, Anomalin) (Ad)           | <i>Seseli sessiliflorum</i> Schrenk ( <i>Seseli tschuense</i> E. Nikit.)                    | + | ? | ? | ? | ? | ? | — | ? | ?    | [113] |
| (-)-Praeruptorin B (Praeruptorin D, Anomalin) (Ad)           |                                                                                             | + | ? | ? | ? | ? | ? | — | ? | ?    |       |
| Floroselin (Ad)                                              |                                                                                             | + | ? | ? | ? | ? | ? | — | ? | ?    | [143] |
| Khellactone 3'-O-isovaleroyl-4'-O angeloyl ester (Ad)        | <i>Seseli talassicum</i> Pimenov & Sdobnina                                                 | + | ? | ? | ? | ? | ? | — | ? | ?    | [113] |
| Praeruptorin C (Ad)                                          | <i>Seseli tenuisectum</i> Regel & Schmalh.                                                  | + | ? | ? | ? | ? | ? | — | ? | ?    | [113] |
| (-)-Praeruptorin B (Ad)                                      |                                                                                             | + | ? | ? | ? | ? | ? | — | ? | ?    |       |
| Agasyllin (L)                                                |                                                                                             | + | ? | ? | ? | ? | ? | — | ? | ?    |       |
| <i>cis</i> -Khellactone (Ad)                                 |                                                                                             | + | ? | ? | ? | ? | ? | — | ? | ?    |       |
| <i>trans</i> -Khellactone (Ad)                               |                                                                                             | + | ? | ? | ? | ? | ? | — | ? | ?    |       |
| Pteryxin (Ad)                                                | <i>Seseli valentinae</i> Popov                                                              | + | ? | ? | ? | ? | ? | — | ? | ?    | [143] |
| (-)-3-(R)-Decursinol (Smirniol,                              | <i>Smyrniopsis aucheri</i> Boiss.                                                           | + | ? | ? | ? | ? | ? | — | ? | ?    | [143] |

|                                           |            |                                                                                       |   |   |   |   |   |   |   |   |   |           |
|-------------------------------------------|------------|---------------------------------------------------------------------------------------|---|---|---|---|---|---|---|---|---|-----------|
| Aegelinol) (L)                            |            |                                                                                       |   |   |   |   |   |   |   |   |   |           |
| (-)-3-(R)-Decursinol                      | (Smirniol, | <i>Zosima absinthifolia</i> (Vent)                                                    | + | ? | ? | ? | ? | ? | - | ? | ? | [146]     |
| Aegelinol) (L)                            |            | Link                                                                                  |   |   |   |   |   |   |   |   |   |           |
| Agasyllin (L)                             |            |                                                                                       | + | ? | ? | ? | ? | ? | - | ? | ? |           |
| Agasyllin (L)                             |            | <i>Zosima korovinii</i> Pimenov                                                       | + | ? | ? | ? | ? | ? | - | ? | ? | [147]     |
| <i>Rutaceae</i>                           |            |                                                                                       |   |   |   |   |   |   |   |   |   |           |
| Decursinol (L)                            |            | <i>Aegle marmelos</i> L.                                                              | + | ? | ? | ? | ? | ? | ? | ? | ? | [148]     |
| Xanthyletin (L)                           |            | <i>Afreagle paniculata</i>                                                            | + | ? | ? | ? | ? | ? | ? | ? | ? | [148]     |
| Xanthoxyletin (L)                         |            | (Schumach. & Thonn.) Engl.                                                            | + | ? | ? | ? | ? | ? | ? | ? | ? |           |
| Seselin (Ad)                              |            | <i>Atalantia buxifolia</i> (Poir.) Oliv. ex Benth. ( <i>Severinia buxifolia</i> Ten.) | + | ? | ? | ? | ? | ? | ? | ? | ? | [148]     |
| Xanthyletin 3-(3-metylbut-2-enyl) (L)     |            | <i>Atalantia simplicifolia</i> (Roxb.) Engl. ( <i>Amyris simplicifolia</i> Roxb.)     | - | ? | ? | ? | ? | + | ? | ? | ? | [148]     |
| Xanthyletin (L)                           |            | <i>Atalantia monophylla</i> (Roxb.) A. DC.                                            | - | ? | ? | ? | ? | ? | ? | + | ? | [148]     |
| Xanthyletin (L)                           |            | <i>Boenninghausenia albiflora</i>                                                     | + | ? | ? | ? | ? | ? | ? | ? | ? | [148]     |
| Xanthyletin 3-(1,1-dimetylbut-3-enyl) (L) |            | (Hook.) Rchb. ex Meisn.                                                               | + | ? | ? | ? | ? | ? | ? | ? | ? |           |
| Xanthyletin (L)                           |            | <i>Citrus aurantiifolia</i> (Christm.) Swingle, ( <i>Citrus acida</i> Roxb.)          | + | ? | ? | ? | ? | ? | ? | ? | ? | [148]     |
| Xanthyletin (L)                           |            | <i>Citrus aurantium</i> L.                                                            | + | ? | ? | ? | ? | ? | ? | ? | ? | [148]     |
| Seselin (Ad)                              |            |                                                                                       | + | ? | ? | ? | ? | ? | ? | ? | ? |           |
| Poncitrin (L)                             |            |                                                                                       | + | ? | ? | ? | ? | ? | ? | ? | ? |           |
| Hystrixarin (Turgeniifolin B) (Ad)        |            | <i>Citrus hystrix</i> D.C.                                                            | - | ? | ? | ? | ? | ? | ? | + | ? | [149]     |
| Decursidinol (L)                          |            |                                                                                       | - | ? | ? | ? | ? | ? | ? | + | ? |           |
| Xanthyletin (L)                           |            |                                                                                       | - | ? | ? | ? | ? | ? | ? | + | ? |           |
| Seselin (Ad)                              |            |                                                                                       | - | ? | ? | ? | ? | ? | ? | + | ? |           |
| Seselin (Ad)                              |            | <i>Citrus limetta</i> Risso                                                           | + | ? | ? | ? | ? | ? | ? | ? | ? | [148]     |
| Xanthyletin (L)                           |            | <i>Citrus limettiioides</i> Tanaka                                                    | + | ? | ? | ? | ? | ? | ? | ? | ? | [148]     |
| Xanthyletin (L)                           |            | <i>Citrus limon</i> (L.) Osbeck                                                       | + | ? | ? | ? | ? | ? | ? | + | ? | [148,150] |
| Xanthoxyletin (L)                         |            |                                                                                       | - | ? | ? | ? | ? | ? | ? | + | ? | [150]     |
| Xanthyletin (L)                           |            | <i>Citrus medica</i> L.                                                               | - | ? | ? | ? | ? | ? | ? | + | ? | [148]     |
| Nordentatin (L)                           |            |                                                                                       | - | ? | ? | ? | ? | ? | ? | + | ? |           |
| Xanthyletin (L)                           |            | <i>Citrus nobilis v. sunkii</i> Lour.                                                 | + | ? | ? | ? | ? | ? | ? | ? | ? | [148]     |
| Xanthyletin (L)                           |            | <i>Citrus paradisi</i> Macfad.                                                        | + | ? | ? | ? | ? | ? | ? | ? | ? | [148]     |
| Seselin                                   |            |                                                                                       | + | ? | ? | ? | ? | ? | ? | ? | ? |           |
| Xanthyletin (L)                           |            | <i>Citrus sinensis</i> (L.) Osbeck.                                                   | + | ? | ? | ? | + | + | ? | ? | ? | [148,150] |
| Xanthoxyletin (L)                         |            |                                                                                       | - | ? | ? | ? | + | ? | ? | ? | ? | [150]     |
| Xanthyletin (L)                           |            | <i>Citrus tankan</i> Hayata                                                           | + | ? | ? | ? | ? | ? | ? | ? | ? | [148]     |
| Xanthyletin (L)                           |            | <i>Chloroxylon swietenia</i> DC.                                                      | + | ? | ? | ? | ? | ? | ? | ? | ? | [148]     |
| Xanthoxyletin (L)                         |            |                                                                                       | + | ? | ? | ? | ? | ? | ? | ? | ? |           |
| Luvangetin (L)                            |            |                                                                                       | + | ? | ? | ? | ? | ? | ? | ? | ? |           |
| Alloxanthoxyletin (Au)                    |            |                                                                                       | + | ? | ? | ? | ? | ? | ? | ? | ? |           |
| Xanthyletin (L)                           |            | <i>Choisya arizonica</i> Standl.                                                      | - | ? | ? | ? | + | ? | ? | ? | ? | [148]     |
| Xanthyletin (L)                           |            | <i>Choisya mollis</i> Standl.                                                         | - | ? | ? | ? | + | ? | ? | ? | ? | [148]     |
| Xanthyletin (L)                           |            | <i>Choisya ternata</i> Kunth.                                                         | + | ? | ? | ? | ? | ? | ? | ? | ? | [148]     |
| Xanthoxyletin (L)                         |            | <i>Clausena anisata</i>                                                               | - | ? | ? | ? | ? | ? | ? | + | ? | [148]     |
| Xanthyletin 3-(1,1-dimetylbut-3-          |            | (Willd.) Hook.f. ex Benth.                                                            | - | ? | ? | ? | ? | ? | ? | + | ? |           |

[illegible]

|                                                                 |  |                                                                                                   |   |   |   |   |   |   |   |   |   |           |
|-----------------------------------------------------------------|--|---------------------------------------------------------------------------------------------------|---|---|---|---|---|---|---|---|---|-----------|
|                                                                 |  | Stschegl.                                                                                         |   |   |   |   |   |   |   |   |   |           |
| Xanthyletin (L)                                                 |  | <i>Haplophyllum multicaule</i>                                                                    | + | ? | ? | ? | ? | ? | ? | ? | ? | [144]     |
| Seselin (Ad)                                                    |  | Vved.                                                                                             | + | ? | ? | ? | ? | ? | ? | ? | ? | [148]     |
| Seselin (Ad)                                                    |  | <i>Haplophyllum schelkovnikovii</i> Grossh.                                                       | — | ? |   |   | + |   |   | ? | ? | [153]     |
| Lomatin isovalerate (Ad)                                        |  | <i>Haplophyllum tenue</i> Boiss.                                                                  | + | ? | ? | ? | ? | ? | ? | ? | ? | [114]     |
| Seselin (Ad)                                                    |  | <i>Haplophyllum thesioides</i> (Fisch. ex DC.) G.Don                                              | — | ? |   |   | + |   |   | ? | ? | [154]     |
| Luvangetin (L)                                                  |  | <i>Hesperathusa crenulata</i> Roem.                                                               | — | ? | ? | ? | ? | + | ? | ? | ? | [148]     |
| Xanthyletin (L)                                                 |  | <i>Hortia arborea</i> Engl.                                                                       | — | ? | ? | ? | ? | ? | ? | + | ? | [148]     |
| Xanthyletin 3-(1,1-dimetylbut-3-enyl) (L)                       |  |                                                                                                   | — | ? | ? | ? | ? | ? | ? | + | ? | [148]     |
| Xanthoxyletin (L)                                               |  | <i>Luvunga eleutherandra</i> Dalz.                                                                | — | ? | ? | ? | + | ? | ? | ? | ? | [148]     |
| Xanthoxyletin (L)                                               |  | <i>Luvunga scandens</i> (Roxb.)                                                                   | — | ? | ? | ? | ? | ? | ? | ? | + | [148]     |
| Luvangetin (L)                                                  |  | Buch. Ham.                                                                                        | — | ? | ? | ? | ? | ? | ? | ? | + | [148]     |
| Xanthoxyletin (L)                                               |  | <i>Melicope mantellii</i> Buch.                                                                   | — | ? | ? | ? | ? | ? | + | ? | ? | [148]     |
| Xanthoxyletin (L)                                               |  | <i>Melicope ternata</i> Forst.                                                                    | — | ? | ? | ? | ? | ? | + | ? | ? | [148]     |
| Braylin (Ad)                                                    |  | <i>Pitavia punctata</i> Mol.                                                                      | — | ? | ? | ? | + | + | ? | ? | ? | [148]     |
| Seselin (Ad)                                                    |  | <i>Phebalium squamulosum</i> Vent.( <i>Phebalium argenteum</i> )                                  | — | ? | ? | ? | ? | + | ? | ? | ? | [148]     |
| Avicennin (Au*)                                                 |  | <i>Philotheca coccinea</i> (C.A.Gardner) Paul G.Wilson ( <i>Eriostemon coccineus</i> C.A.Gardner) | — | ? | ? | ? | + | ? | ? | ? | ? | [148]     |
| Xanthoxyletin (L)                                               |  | <i>Philotheca obovalis</i> (Cunn.) Paul G.Wilson ( <i>Eriostemon obovalis</i> A.Cunn.)            | + | ? | ? | ? | ? | ? | ? | ? | ? | [148]     |
| Xanthoxyletin (L)                                               |  | <i>Philotheca trachyphylla</i> (F.Muell.) Paul G.Wilson                                           | + | ? | ? | ? | ? | ? | ? | ? | ? | [148]     |
| Trachyphyllin (L)                                               |  | ( <i>Eriostemon trachyphyllus</i> F.Muell.)                                                       |   |   |   |   |   |   |   |   |   |           |
| Poncitrin (L)                                                   |  | <i>Poncirus trifoliata</i> (L.) Raf.                                                              | + | ? | ? | ? | ? | ? | ? | ? | ? | [148]     |
| Seselin (Ad)                                                    |  |                                                                                                   | + | ? | ? | ? | ? | ? | ? | ? | ? |           |
| Xanthoxyletin (L)                                               |  | <i>Ruta graveolens</i> L.                                                                         | + | ? | ? | ? | ? | ? | ? | ? | ? | [148]     |
| Xanthyletin 3-(1,1-dimetylbut-3-enyl)-8-(3-metylbut-2-enyl) (L) |  |                                                                                                   | + | ? | ? | ? | ? | ? | ? | ? | ? |           |
| Xanthoxyletin (L)                                               |  | <i>Ruta microcapra</i> Svent.                                                                     | — | ? | ? | ? | ? | + | ? | ? | ? | [148]     |
| Luvangetin (L)                                                  |  |                                                                                                   | — | ? | ? | ? | ? | + | ? | ? | ? |           |
| Xanthoxyletin (L)                                               |  | <i>Ruta oreojasme</i> Webb.                                                                       | + | ? | ? | ? | ? | ? | ? | ? | ? | [148]     |
| Luvangetin (L)                                                  |  |                                                                                                   | + | ? | ? | ? | ? | ? | ? | ? | ? |           |
| Seselin (Ad)                                                    |  |                                                                                                   | + | ? | ? | ? | ? | ? | ? | ? | ? |           |
| Xanthoxyletin (L)                                               |  | <i>Ruta pinnata</i> L. fil.                                                                       | + | ? | ? | ? | ? | ? | ? | ? | ? | [148]     |
| Luvangetin (L)                                                  |  |                                                                                                   | + | ? | ? | ? | ? | ? | ? | ? | ? |           |
| Seselin (Ad)                                                    |  |                                                                                                   | + | ? | ? | ? | ? | ? | ? | ? | ? |           |
| Seselin (Ad)                                                    |  | <i>Scimmia repens</i> Nakai                                                                       | — | ? | ? | ? | + | ? | ? | ? | ? | [148]     |
| Jatamansin (Selinidin,                                          |  | <i>Xanthogallum purpurascens</i> Lallem.                                                          | — | ? | ? | ? | ? | ? | ? | + | ? | [113,155] |
| Xanthogalin (Ad)                                                |  |                                                                                                   |   |   |   |   |   |   |   |   |   |           |
| Lomatin (Ad)                                                    |  |                                                                                                   | + | ? | ? | ? | ? | ? | ? | ? | ? | [144]     |
| Xanthyletin (L)                                                 |  | <i>Zanthoxylum ailanthoides</i> Siebold & Zucc.                                                   | + | ? | ? | ? | ? | ? | ? | ? | ? | [148]     |
| Xanthyletin (L)                                                 |  | <i>Zanthoxylum americanum</i>                                                                     | — | ? | ? | ? | ? | ? | ? | + | ? | [148]     |
| Xanthoxyletin (L)                                               |  | Mill.                                                                                             | — | ? | ? | ? | ? | ? | ? | + | ? |           |
| Arnottianin                                                     |  | <i>Zanthoxylum arnottianum</i>                                                                    | + | ? | ? | ? | ? | ? | ? | ? | ? | [148]     |

|                                                                                                                          |                                                                  |   |   |   |   |   |   |   |   |   |   |         |
|--------------------------------------------------------------------------------------------------------------------------|------------------------------------------------------------------|---|---|---|---|---|---|---|---|---|---|---------|
| Xanthyletin (L)                                                                                                          | Maxim.                                                           | + | ? | ? | ? | ? | ? | ? | ? | ? |   |         |
| Avicennin (Au)                                                                                                           | <i>Zanthoxylum avicennae</i>                                     | – | ? | ? | ? | ? | ? | ? | ? | + | ? | [148]   |
| Avicennol (Au)                                                                                                           | Lam.                                                             | – | ? | ? | ? | ? | ? | ? | ? | + | ? |         |
| Luvangetin (L)                                                                                                           | <i>Zanthoxylum asiaticum</i>                                     | + | ? | ? | ? | ? | ? | ? | ? | ? | ? | [148]   |
| Norbraylin (Ad)                                                                                                          | (L.) Appelhans, Groppo & J.Wen ( <i>Toddalia aculeata</i> Pers.) | + | ? | ? | ? | ? | ? | ? | ? | ? | ? |         |
| Xanthoxyletin (L)                                                                                                        | <i>Zanthoxylum dipetalum</i> H.                                  | – | ? | ? | ? | ? | ? | ? | ? | + | ? | [148]   |
| Dipetaline (Au)                                                                                                          | Mann                                                             | – | ? | ? | ? | ? | ? | ? | ? | + | ? |         |
| Avicennol (Au)                                                                                                           |                                                                  | – | ? | ? | ? | ? | ? | ? | ? | + | ? |         |
| Xanthoxyletin (L)                                                                                                        | <i>Zanthoxylum elephantiasis</i>                                 | + | ? | ? | ? | ? | ? | ? | ? | ? | ? | [148]   |
| Avicennin (Au)                                                                                                           | Macfad.                                                          | + | ? | ? | ? | ? | ? | ? | ? | ? | ? |         |
| Avicennol (Au)                                                                                                           |                                                                  | + | ? | ? | ? | ? | ? | ? | ? | ? | ? |         |
| c-Avicennol (Au)                                                                                                         |                                                                  | + | ? | ? | ? | ? | ? | ? | ? | ? | ? |         |
| Xanthyletin (L)                                                                                                          | <i>Zanthoxylum faurei</i> Ohwi                                   | – | ? | ? | ? | ? | ? | ? | ? | + | ? | [148]   |
| Xanthyletin (L)                                                                                                          | <i>Zanthoxylum pluviatile</i> Hartley                            | – | ? | ? | ? | ? | + | ? | ? | ? | ? | [148]   |
| <i>Calophyllaceae</i>                                                                                                    |                                                                  |   |   |   |   |   |   |   |   |   |   |         |
|                                                                                                                          | <i>Mammea siamensis</i> T.                                       | – | ? | + | ? | + | ? | ? | ? | ? | ? | [18,67] |
| Mammea A/AD cyclo D (Ad)                                                                                                 | Anders.                                                          |   |   |   |   |   |   |   |   |   |   |         |
| Mammea A/AA cyclo D (Ad)                                                                                                 |                                                                  | – | ? | ? | ? | + | ? | ? | ? | ? | ? |         |
|                                                                                                                          |                                                                  | – | ? | + | ? | + | ? | ? | ? | ? | ? |         |
| Mammea A/AB cyclo D (Ad)                                                                                                 |                                                                  |   |   |   |   |   |   |   |   |   |   |         |
|                                                                                                                          |                                                                  | – | ? | + | ? | + | ? | ? | ? | ? | ? |         |
| 8-hydroxy-5-methyl-7-(3-methyl-but-2-enyl)-9-(3-methyl-1-oxobutyl)-4,5-dihydropyrano[4,3,2-de]chromen-2-one (C)          |                                                                  |   |   |   |   |   |   |   |   |   |   |         |
| 8-hydroxy-5-methyl-7-(3,7-dimethyl-octa-2,6-dienyl)-9-(3-methyl-1-oxobutyl)-4,5-dihydropyrano[4,3,2-de]chromen-2-one (C) |                                                                  | – | ? | ? | ? | + | ? | ? | ? | ? | ? |         |
| 8-hydroxy-5-methyl-7-(3-methyl-but-2-enyl)-9-(2-methyl-1-oxobutyl)-4,5-dihydropyrano[4,3,2-de]chromen-2-one (C)          |                                                                  | – | ? | + | ? | + | ? | ? | ? | ? | ? | [18,67] |
| 8-hydroxy-5-methyl-7-(3,7-dimethyl-octa-2,6-dienyl)-9-(2-methyl-1-oxobutyl)-4,5-dihydropyrano[4,3,2-de]chromen-2-one (C) |                                                                  | – | ? | ? | ? | + | ? | ? | ? | ? | ? | [18]    |
| Mammeasin C (C)                                                                                                          |                                                                  | – | ? | + | ? | ? | ? | ? | ? | ? | ? | [67]    |
| Mammeasin D (C)                                                                                                          |                                                                  | – | ? | + | ? | ? | ? | ? | ? | ? | ? |         |
| Mammea B/AB cyclo D (Ad)                                                                                                 |                                                                  | – | ? | + | ? | ? | ? | ? | ? | ? | ? |         |
| Mammea B/AC cyclo D (Ad)                                                                                                 |                                                                  | – | ? | + | ? | ? | ? | ? | ? | ? | ? |         |
| Mammea E/BC cyclo D (Au)                                                                                                 |                                                                  | – | ? | + | ? | ? | ? | ? | ? | ? | ? |         |
| Mammea E/BD cyclo D (Au)                                                                                                 |                                                                  | – | ? | + | ? | ? | ? | ? | ? | ? | ? |         |
| Mammea E/AA cyclo D (Ad)                                                                                                 |                                                                  | – | ? | + | ? | ? | ? | ? | ? | ? | ? |         |
| Mammea E/BB cyclo D (Au)                                                                                                 |                                                                  | – | ? | + | ? | ? | ? | ? | ? | ? | ? |         |
| Mammea E/BC cyclo D (Au)                                                                                                 |                                                                  | – | ? | + | ? | ? | ? | ? | ? | ? | ? |         |
| <i>Cornaceae</i>                                                                                                         |                                                                  |   |   |   |   |   |   |   |   |   |   |         |

|                                               |                                |                       |   |   |   |   |   |   |   |   |   |       |
|-----------------------------------------------|--------------------------------|-----------------------|---|---|---|---|---|---|---|---|---|-------|
| Decursitin C (Andelin) (L)                    | <i>Camptotheca</i>             | <i>acuminata</i>      | – | ? | ? | ? | ? | ? | ? | + | ? | [156] |
|                                               | Decne.                         |                       |   |   |   |   |   |   |   |   |   |       |
|                                               | <i>Fabaceae</i>                |                       |   |   |   |   |   |   |   |   |   |       |
| Phenyl derivative of pyranocoumarin (PDP) (L) | <i>Psoralea corylifolia</i> L. |                       | – | ? | ? | ? | ? | ? | ? | ? | + | [21]  |
|                                               | <i>Ranunculaceae</i>           |                       |   |   |   |   |   |   |   |   |   |       |
| Luvangetin (L)                                | <i>Eranthis</i>                | <i>longistipitata</i> | – | + | ? | ? | ? | ? | – | ? | ? | [157] |
|                                               | Regel.                         |                       |   |   |   |   |   |   |   |   |   |       |

\*Ad –angular 7,8-pyranocoumarin; L – linear 6,7-pyranocoumarin; Au – angular 5,6-pyranocoumarin; C – condensed 4,5-pyranocoumarin.
